## A global overview of pleiotropy and genetic architecture in complex traits

**Authors:** Kyoko Watanabe<sup>1</sup>, Sven Stringer<sup>1</sup>, Oleksandr Frei<sup>2</sup>, Maša Umičević Mirkov<sup>1</sup>, Tinca J.C. Polderman<sup>1</sup>, Sophie van der Sluis<sup>1,3</sup>, Ole A. Andreassen<sup>2,4</sup>, Benjamin M. Neale<sup>5-7</sup>, Danielle Posthuma<sup>1,3\*</sup>

### Affiliations:

1. Department of Complex Trait Genetics, Center for Neurogenomics and Cognitive Research, Neuroscience Campus Amsterdam, VU University Amsterdam, The Netherlands.
2. NORMENT, KG Jebsen Centre for Psychosis Research, Institute of Criminal Medicine, University of Oslo, Oslo, Norway
3. Department of Clinical Genetics, Section of Complex Trait Genetics, Neuroscience Campus Amsterdam, VU Medical Center, Amsterdam, the Netherlands.
4. Division of Mental health and addiction Oslo University hospital, Oslo, Norway
5. Program in Medical and Population Genetics, Broad Institute of MIT and Harvard, Cambridge, MA, USA
6. Analytic and Translational Genetics Unit, Department of Medicine, Massachusetts General Hospital, Boston, MA, USA
7. Stanley Center for Psychiatric Research, Broad Institute of MIT and Harvard, Cambridge, MA, USA

\*Correspondence to: Danielle Posthuma, Department of Complex Trait Genetics, VU University, De Boelelaan 1085, 1081 HV, Amsterdam, The Netherlands. Phone: +31 20 5982823, Fax: +31 20 5986926, Email: [d.posthuma@vu.nl](mailto:d.posthuma@vu.nl)

**Word count:** Abstract 181 words, Main text 5,762 words and Methods 4,572 words

**References:** 40

**Display items:** 4 figures and 2 tables

**Extended Data:** 11 figures

**Supplementary Information:** Text 3,401 words and 25 tables

## 2 **ABSTRACT**

3 After a decade of genome-wide association studies (GWASs), fundamental questions in  
4 human genetics are still unanswered, such as the extent of pleiotropy across the genome, the  
5 nature of trait-associated genetic variants and the disparate genetic architecture across human  
6 traits. The current availability of hundreds of GWAS results provide the unique opportunity  
7 to gain insight into these questions. In this study, we harmonized and systematically analysed  
8 4,155 publicly available GWASs. For a subset of well-powered GWAS on 558 unique traits,  
9 we provide an extensive overview of pleiotropy and genetic architecture. We show that trait  
10 associated loci cover more than half of the genome, and 90% of those loci are associated with  
11 multiple trait domains. We further show that potential causal genetic variants are enriched in  
12 coding and flanking regions, as well as in regulatory elements, and how trait-polygenicity is  
13 related to an estimate of the required sample size to detect 90% of causal genetic variants.  
14 Our results provide novel insights into how genetic variation contributes to trait variation. All  
15 GWAS results can be queried and visualized at the GWAS ATLAS resource  
16 (<http://atlas.ctglab.nl>).

## 17 MAIN TEXT

18 Since the first genome-wide association study (GWAS) on macular degeneration in 2005<sup>1</sup>,  
19 over 3,000 GWASs have been published, for more than 1,000 traits, reporting on over tens of  
20 thousands of significantly associated genetic variants<sup>2</sup>. Results from GWASs have increased  
21 our insight into the genetic architectures of investigated traits, and for some traits, GWAS  
22 results have led to further insight into disease mechanisms<sup>3,4</sup>, such as autophagy for Crohn's  
23 disease<sup>5</sup>, immunodeficiency for Rheumatoid arthritis<sup>6</sup> and transcriptome regulation through  
24 *FOXA2* in the pancreatic islet and liver for Type 2 diabetes<sup>7</sup>. The emerging picture after over  
25 a decade of GWASs is that the majority of studied traits are highly polygenic and thus  
26 influenced by many genetic variants each of small effect<sup>4,8</sup>, with disparate genetic  
27 architectures across traits<sup>9</sup>. Fundamental questions, such as whether all genetic variants or all  
28 genes in the human genome are associated with at least one trait, with many or even all traits,  
29 and whether the polygenic effects for specific traits are functionally clustered or whether they  
30 are randomly spread across the genome, are however still unanswered<sup>4,10,11</sup>. Answers to these  
31 questions would greatly enhance our understanding of how genetic variation leads to trait  
32 variation and trait correlation. Whereas GWAS primarily aims to discover genetic variants  
33 associated with specific traits, the current availability of a vast amount of GWAS results can  
34 be used to investigate some of these fundamental questions.

35 To this end, we compiled a catalogue of 4,155 GWAS results across 2,965 unique traits from  
36 295 studies, including publicly available GWASs and new results for 600 traits from the UK  
37 Biobank (<http://atlas.ctglab.nl>). These GWAS results were used in the current study to  
38 achieve the following aims; *i*) charting the extent of pleiotropy at trait-associated locus, gene,  
39 SNP and gene-set levels, *ii*) characterizing the nature of trait-associated variants (i.e. the  
40 distribution of effect size, minor allele frequency and biological functionality of trait-  
41 associated or credible SNPs), and *iii*) understanding the nature of the genetic architecture

42 across a variety of traits and domains in terms of SNP heritability and trait polygenicity (see  
43 **Extended Data Fig. 1**).

44

#### 45 **Catalogue of 4,155 GWAS summary statistics for 2,965 unique traits**

46 We collected publicly available full GWAS summary statistics (last update 23<sup>rd</sup> October  
47 2018; see **Methods**). This resulted in 3,555 GWAS summary statistics from 294 studies. We  
48 additionally performed GWAS on 600 traits available from the UK Biobank release 2 cohort  
49 (UKB2; release May 2017)<sup>12</sup>, by selecting non-binary traits with >50,000 European  
50 individuals with non-missing phenotypes, and binary traits for which the number of available  
51 cases and controls were each >10,000 and total sample size was >50,000 (see **Methods**,  
52 **Supplementary Information 1** and **Supplementary Table 1-2**). In total, we collected 4,155  
53 GWASs from 295 unique studies and 2,965 unique traits (see **Supplementary Table 3** for a  
54 full list of collected GWASs). Traits were manually classified into 27 standard domains  
55 based on previous studies<sup>13,14</sup>. The average sample size across curated GWASs was 56,250  
56 subjects. The maximum sample size was 898,130 subjects for a Type 2 Diabetes meta-  
57 analysis<sup>15</sup>. The 4,155 GWAS results are made available in an online database  
58 (<http://atlas.ctglab.nl>). The database provides a variety of information per trait, including  
59 SNP-based and gene-based Manhattan plots, gene-set analyses<sup>16</sup>, SNP heritability  
60 estimates<sup>17</sup>, genetic correlations, cross GWAS comparisons and phenome-wide plots.  
61 For the present study, we restricted our analyses to reasonably powered GWASs (i.e. sample  
62 size >50,000), to avoid including SNP effect estimates with relatively large standard errors  
63 (see **Methods**). By selecting a GWAS with the largest sample size per trait, it resulted in 558  
64 GWASs for 558 unique traits across 24 trait domains. The average sample size of these 558  
65 GWASs was 256,276, and 478 GWASs (85.7%) were based on the UKB2 including 11 meta-  
66 analyses with UKB2, 46 (8.2%) on the UK Biobank release 1 cohort (UKB1) including 8

67 meta-analyses with UKB1, and the remaining were non-UKB cohorts. All results presented  
68 hereafter concern these selected 558 GWASs unless specified otherwise. The online database,  
69 however, allows researchers to reproduce similar analyses with custom selections of GWASs.

70

## 71 **The extent of pleiotropy**

72 Results of previous GWASs have shown significant associations of thousands of genomic  
73 loci with a large number of traits<sup>2,4</sup>. Given a finite number of segregating variants on the  
74 human genome, this suggests the presence of widespread pleiotropy. Pleiotropy may be  
75 informative to the reasons of co-morbidity between traits, as it may indicate an underlying  
76 shared genetic mechanism, and may aid in resolving questions regarding causal effects of one  
77 trait on another. However, the exact extent of pleiotropy across the genome is currently  
78 unknown<sup>4</sup>. We therefore investigated pleiotropy at locus, gene, SNP and gene-set levels. We  
79 defined pleiotropy as the presence of statistically significant associations with more than one  
80 trait domain as traits within domain tend to show stronger phenotypic correlations than  
81 between domains (see **Supplementary Information 2** and **Extended Data Fig. 2**). Our  
82 definition thus refers to ‘statistical pleiotropy’, and includes situations of true pleiotropy (e.g.  
83 one SNP directly influences multiple traits), or situations where statistical associations to  
84 multiple traits are induced via causal effects of one trait on another, via phenotypic  
85 correlations between traits, or via a third common factor<sup>18</sup>. We defined the level of pleiotropy  
86 by the number of associated domains, and further grouped into four categories; multi-domain  
87 (associated with traits from multiple domains), domain-specific (associated with multiple  
88 traits from a single domain), trait-specific (associated with a single trait) and non-associated  
89 (**Methods**). We then assessed whether pleiotropic associations at the locus, gene, SNP or  
90 gene set level are structurally or functionally different from trait- or domain-specific  
91 associations or non-associated sites.

92

93 *Pleiotropic genomic loci*

94 The 558 GWASs yielded 41,511 trait-associated loci (from 470 traits, as 88 traits did not  
95 yield any genome-wide significant association after QC; see **Methods**). After grouping  
96 physically overlapping trait-associated loci, we obtained 3,362 grouped loci (**Methods**,  
97 **Extended Data Fig. 3**, and **Supplementary Table 4**). The total summed length of these loci  
98 (1706.0 Mb) covered 61.0% of the genome. Of these, 93.3% were associated with more than  
99 one trait and 90.0% were multi-domain loci (**Table 1** and **Extended Data Fig. 4a, b**). The  
100 multi-domain and domain-specific loci showed a significantly higher density of protein  
101 coding genes compared to non-associated genomic regions ( $p=5.3e-16$  and  $p=2.6e-4$ ; **Fig. 1a**  
102 and **Supplementary Table 5**).

103 The locus associated with the largest number of traits and domains (i.e. the most pleiotropic  
104 locus) was the MHC region (chr 6:25Mb-37Mb), which contained 441 trait-associated loci  
105 from 213 traits across 23 trait domains. The MHC region is well-known for its complex  
106 structure of linkage disequilibrium, spanning over 300 genes. The extremely pleiotropic  
107 nature of this region might, therefore, be explained by its long-ranged LD block due to  
108 overlap of multiple independent signals from multiple traits. Similarly, high locus pleiotropy,  
109 not limited to the MHC region, can occur purely due to the overlap of the LD blocks of the  
110 loci in the grouped locus, and they may not share the same causal SNPs. By performing  
111 colocalization (i.e. statistically identifying loci sharing the same causal SNP) for all possible  
112 pairs of physically overlapping trait-associated loci (see **Methods, Supplementary**  
113 **Information 3** and **Extended Data Fig. 3**), we indeed observed a decrease in the number of  
114 associated traits and trait domains per group of colocalized loci compared to loci defined by  
115 physical overlap (**Extended Data Fig. 4** and **Supplementary Table 6**). In addition, loci  
116 grouped based on physical overlap often contained multiple independent groups of

117 colocalized loci (**Supplementary Table 6**). Therefore, physical overlap of trait-associated  
118 loci does not necessary mean that the same causal SNPs are involved in the traits associated  
119 with such a grouped locus. Examination of pleiotropy at the gene or SNP level will provide  
120 further insight into the nature of the pleiotropy observed at the locus level.

121

### 122 *Pleiotropic genes*

123 We next investigated the extent of pleiotropy at the gene level. For this, we conducted a  
124 gene-based analysis on 17,444 protein-coding genes using MAGMA for each trait<sup>16</sup>  
125 (**Methods**). Of the 558 traits, 516 yielded at least one significantly associated gene and  
126 11,443 (65.6%) genes were significantly associated to at least one trait (**Supplementary**  
127 **Table 7**). Of these, 81.0% were associated with more than one trait and 66.9% were  
128 associated with traits from multiple domains (**Table 1** and **Extended Data Fig. 5a, b**). We  
129 found that genes associated with at least one trait are significantly longer than genes that are  
130 not associated with any of the 558 tested traits ( $p=2.1e-194$ ,  $p=8.7e-12$  and  $p=3.8e-29$  for  
131 multi-domain, domain-specific and trait-specific genes, respectively; **Fig. 1b** and  
132 **Supplementary Table 8**). As the MAGMA algorithm is insensitive to bias caused by gene-  
133 length, these findings are unlikely to be due to larger genes having an increased statistical  
134 probability to be significantly associated (**Supplementary Information 4, Extended Data**  
135 **Fig. 5c** and **Supplementary Table 9**). The multi-domain genes showed a significantly higher  
136 probability of being intolerant to loss of function mutations (pLI score)<sup>19</sup> compared to trait-  
137 /domain-specific and non-associated genes ( $p=1.2e-79$ ,  $p=4.8e-22$  and  $p=2.8e-19$ ,  
138 respectively; **Fig. 1c** and **Supplementary Table 10**), suggesting that more pleiotropic genes  
139 are on average less tolerant to loss of function variants. The most pleiotropic genes are  
140 located in the MHC region, yet a region on chromosome 3 also spanned multiple genes with

141 high levels of pleiotropy (**Extended Data Fig. 5a**). In this region, *BSN* was associated with  
142 the largest number of trait domains (94 traits across 17 domains).  
143 We next tested whether tissue specificity of genes was related to the level of pleiotropy by  
144 counting the number of active tissues per gene based on gene expression profiles for 53 tissue  
145 types obtained from GTEx<sup>20</sup> (see **Methods**). The results showed that the proportion of genes  
146 expressed in all 53 tissue types increases along with the level of pleiotropy ( $p=9.7e-05$ , **Fig.**  
147 **1d** and **Supplementary Table 11**). This indicates that more pleiotropic genes tend to be  
148 active in multiple tissue types, suggesting that those genes are involved in general biological  
149 functions across the human body.

150

#### 151 *Pleiotropic SNPs*

152 The level of pleiotropy at a locus or gene level does not necessarily translate to pleiotropy at  
153 the level of the SNP. For example, within the same locus or gene, multiple SNPs may be  
154 significantly associated with different traits. A locus or gene can thus show a higher level of  
155 pleiotropy compared to individual SNPs. We, therefore, investigated the extent of pleiotropy  
156 at the level of the SNP. To do so, we extracted 1,740,179 SNPs that were present in all 558  
157 GWAS results. We first confirmed that this selection of SNPs had the same distribution of  
158 their location across the genome and their functional consequences as all known SNPs on the  
159 genome (**Methods** and **Extended Data Fig. 6a, b**). We note that some of the observed SNP-  
160 pleiotropy may still be induced by LD, e.g. a SNP could reach genome-wide significance  
161 because of its strong LD with a causal SNP. However, the purpose of this analysis is to  
162 identify individual SNPs (not loci) that are associated with multiple trait domains and their  
163 functions. Of these, 237,120 (13.6%) were genome-wide significant ( $p<5e-8$ ) in at least one  
164 of the 558 traits (**Extended Data Fig. 6c** and **Supplementary Table 12**). Out of 237,120  
165 SNPs that were associated with at least one trait, 60.2% were associated with more than one



166 trait and 32.4% were associated with more than one domain (**Table 1** and **Extended Data**  
167 **Fig. 6d**).

168 These pleiotropic SNPs spread broadly across the genome but were not evenly distributed,  
169 i.e. chromosome 1, 11, 12, 15, 17, 20 and 22 showed relative enrichment of pleiotropic SNPs  
170 (**Supplementary Information 5** and **Supplementary Table 13**). Of all associated SNPs, the  
171 most pleiotropic SNP, located in the MHC region (rs707939; an intronic SNP of *MSH5*) was  
172 associated with 48 traits from 13 domains. There were 45 SNPs associated with 12 trait  
173 domains, of which 35 were located on chromosome 3, 49.8Mb-50.1Mb overlapping with 5  
174 protein coding genes, *TRAIP*, *CAMKV*, *MSTIR*, *MONIA* and *RBM6*. These SNPs include two  
175 exonic SNPs, rs2681781 (synonymous on *CAMKV*) and rs2230590 (nonsynonymous on  
176 *MSTIR*; **Supplementary Table 12**).

177 To investigate whether SNPs with a higher level of pleiotropy have different functional  
178 annotations than less pleiotropic SNPs, we investigated how functional consequence and  
179 tissue specificity in terms of expression quantitative trait loci (eQTLs) were represented  
180 across different levels of SNP pleiotropy (**Methods**). We found that the proportion of intronic  
181 and exonic SNPs increased as a function of the level of pleiotropy ( $p=2.2e-3$  and  $p=1.7e-2$ ,  
182 respectively); the proportion of exonic SNPs increased from less than 1% to over 5%, and the  
183 proportion of intronic SNPs increased from less than 40% to over 50% (**Fig. 1e** and  
184 **Supplementary Table 14**) with increasing levels of pleiotropy. The proportion of SNPs  
185 within flanking regions such as 5' and 3' untranslated regions (UTR) also increased with the  
186 number of associated domains. At the same time, we observed a steep decrease of the  
187 proportion of intergenic SNPs with increasing level of SNP pleiotropy ( $p=8.1e-4$ ; **Fig. 1e** and  
188 **Supplementary Table 14**). Based on active eQTLs, the proportion of SNPs being eQTLs in  
189 a greater number of tissue types (>24 tissue types out of 48) increased along with the number  
190 of associated domains ( $p=8.4e-3$  and  $p=1.1e-2$  for eQTLs in between 25 and 36 tissues, and

191 between 37 and 48 tissues, respectively) while SNPs in genes expressed in a single or less  
192 than half of available tissue types showed decreasing proportion (**Fig. 1f** and **Supplementary**  
193 **Table 15**). These results suggest that highly pleiotropic SNPs are more likely to be genic  
194 (exonic and intronic) and less likely to be tissue specific.

195

#### 196 *Pleiotropic gene-sets*

197 Pleiotropy at the level of trait-associated loci, genes or SNPs do not necessarily suggest the  
198 presence of shared biological pathways across multiple traits. To assess the level of  
199 pleiotropy at the level of gene-sets, reflecting a biological meaningful grouping of genes, we  
200 performed MAGMA gene-set analyses for 558 traits using 10,650 gene-sets (Methods). In  
201 total, 235 (42.1%) traits showed significant association with one of 1,106 (10.4%) gene-sets.  
202 The most pleiotropic gene-set was ‘Regulation of transcription from RNA polymerase II  
203 promoter’ (GO biological process) associated with 61 traits from 9 domains, followed by 7  
204 other gene-sets associated with 7 domains, of which 5 of them were also involved in  
205 regulation of transcription (**Supplementary Table 16**). We observed that the number of  
206 genes in a gene-set was significantly larger for highly pleiotropic gene-sets (associated with  
207 more than one domain) compared to other gene-sets (domain-specific, trait-specific and non-  
208 associated;  $p=4.1e-12$ ,  $p=1.6e-13$  and  $p=1.2e-29$ , respectively; **Extended Data Fig. 7a**, and  
209 **Supplementary Table 17**). Since GO terms (55.6% of tested gene-sets) have a hierarchical  
210 structure, the larger gene-sets are more likely to be located at the top of the hierarchy,  
211 representing more general functional categories.

212 In contrast to the pleiotropy at gene level where 80.9% genes were associated with more than  
213 one trait, we only found 54.8% of the associated gene-sets to be pleiotropic (**Table 1**). We  
214 observed that the proportion of pleiotropic genes per gene-set is not uniformly distributed,  
215 and pleiotropic genes tend to cluster into a subset of gene-sets, explaining the decreased

216 proportion of pleiotropic gene-sets compared to pleiotropic genes (**Extended Data Fig. 7b,**  
217 **c**). At the same time, the higher proportion of trait-specific gene-sets (45.2%) compared to  
218 trait-specific genes (19.2%) suggests that, given current definitions of gene-sets, the  
219 combination of associated genes is rather unique to a trait and focusing on gene-sets to gain  
220 insight into trait-specific biological mechanisms may be more informative than focusing on  
221 single genes (**Supplementary Information 6**).

222

### 223 *Genetic correlations across traits*

224 Above we showed that of all trait-associated loci, genes and SNPs that are associated with at  
225 least one trait, 90.0%, 66.9% and 32.6% are associated with more than one domain,  
226 respectively. Such wide-spread pleiotropy induces non-zero genetic correlations between  
227 traits. To test whether genetic correlations are evenly present across traits or cluster into trait  
228 domains, we computed pairwise genetic correlations ( $r_g$ ) across 558 traits using LDSC<sup>17</sup>.  
229 We calculated the proportion of trait pairs with an  $r_g$  that is significantly different from zero  
230 across all 558 traits, within domains and between domains. Out of 155,403 possible pairs  
231 across 558 traits, 24,106 pairs (15.5%) showed significant genetic correlations after  
232 Bonferroni correction ( $p < 0.05/155,403 = 3.2e-7$ ) with an average  $|r_g|$  of 0.38.

233 In principle, if the trait domains contain traits that are biologically related, we would expect  
234 that traits within the same domain have stronger genetic correlations than traits across  
235 domains. The proportion of pairs with a significant genetic correlation within a domain was  
236 especially high in cognitive, ‘ear, nose, throat’, metabolic and respiratory domains, and for  
237 most of domains, average  $|r_g|$  across significant trait pairs was higher than 0.38 (across all  
238 traits). Note that the proportion of trait pairs with significant  $r_g$  may be biased by sample size  
239 and  $h^2_{SNP}$  of traits within a domain; across 558 traits, the worst case scenarios with the  
240 minimum observed  $h^2_{SNP}$  (0.0045 with sample size 385,289) or the minimum sample size

241 (51,750 with  $h^2_{SNP}=0.0704$ ) required  $r_g$  to be above 0.39 or 0.18, respectively, to gain a  
242 power of 0.8 (**Methods**). Within domain, the majority of significant genetic correlations was  
243 positive and the average  $|r_g|$  was above 0.5 in most of the domains (**Fig. 2a** and  
244 **Supplementary Table 18**). Between domains, the proportion of pairs with significant genetic  
245 correlations was generally lower than within domains, and most of the domain pairs showed  
246 average  $|r_g|<0.4$  (**Fig. 2b** and **Supplementary Table 19**). Some trait domains showed a  
247 predominance of negative genetic correlations with other domains, i.e. activity, cognitive,  
248 reproduction and social interaction domains. We further clustered traits based on genetic  
249 correlations, which resulted in the majority of clusters contained traits from multiple domains  
250 (**Methods, Supplementary Information 7** and **Extended Data Fig. 8**). These results  
251 suggest that although  $|r_g|$  is higher within domain than across domains, the trait domains do  
252 not necessary reflect genetic similarity across traits.

253

#### 254 **The nature of trait-associated variants**

255 We now address the question whether trait-associated variants differ from genetic variants  
256 that are not associated with any trait. For this purpose, we extracted all lead SNPs from each  
257 of the 558 GWASs. Lead SNPs were defined per trait at the standard threshold for genome-  
258 wide significance ( $p<5e-8$ ) and using an  $r^2$  of 0.1 to obtain near-independent lead SNPs,  
259 based on the population-relevant reference panel (see **Methods**). Lead SNPs with minor  
260 allele count (MAC)  $\leq 100$  (based on MAF and sample size of the SNP) were excluded due to  
261 lower statistical power and a high false positive rate of effects of SNPs with extremely small  
262 MAF. This resulted in 82,590 lead SNPs for 476 traits, reflecting 43,455 unique SNPs. Out of  
263 558 traits, 82 traits did not yield any genome-wide significant lead SNP after QC.

264

265 *Distribution of MAF and effect sizes of lead SNPs*

266 12.3% of the 43,455 (unique) lead SNPs derived from the 558 GWASs had a MAF below  
267 0.01 which is significantly less than expected given the proportion of rare variants in the  
268 reference panels ( $p < 1e-323$ ; **Supplementary Information 8**), while the distribution of lead  
269 SNPs with a MAF above 0.01 was nearly uniform (**Fig. 3a**).

270 To gain insight into the distribution of effect sizes across lead SNPs, we calculated the  
271 standardized effect size ( $\beta$ ) from Z-statistics as a function of MAF and sample size<sup>21</sup>, and  
272 inspected the distribution of the squared standardized effect sizes ( $\beta^2$ ) for lead SNPs across  
273 all traits (**Methods**).  $\beta$  ranged between 0.01 and 1.70, and  $\beta^2$  is proportional to the variance  
274 explained. The median  $\beta^2$  of the lead SNPs across all traits was  $5.7e-4$  ( $4.9e-4$  and  $6.0e-2$  for  
275 lead SNPs with  $MAF \geq 0.01$  and  $< 0.01$ , respectively), and 94.6% of lead SNPs had a  $\beta^2$  below  
276 0.05 (**Fig. 3b**). Thus, the vast majority of lead SNPs thus explained less than 0.05% of the  
277 trait variance. We observed a relationship between MAF and standardized effect size, with  
278 rare variants ( $MAF < 0.01$ ) showing larger effect sizes (**Fig. 3c**). This is in line with the notion  
279 that rare variants are more likely to have large effects compared to common variants, as they  
280 are less likely to be under strong selective pressure<sup>22</sup>. However, we also note that statistical  
281 power for detecting the rare variants is un-stable<sup>23</sup>. Given that the proportion of rare lead  
282 SNPs is larger than the proportions in other MAF bins, it is possible that the distribution of  
283 the effect sizes has longer tails for SNPs with  $MAF < 0.01$ . For most of the traits, a similar  
284 relationship between MAF and standardized effect size was observed (**Extended Data Fig.**  
285 **9**), but large variation across traits was seen in terms of the number of rare lead SNPs, with  
286 e.g. a large proportion of rare variants influencing nutritional and connective tissue domains  
287 (see **Supplementary Information 8, Extended Data Fig. 10** and **Supplementary Table 20-**  
288 **21**).

289

290 *Characterization of trait-associated loci and lead SNPs*

291 Here we sought to characterise differences in the distribution of functional annotations when  
292 comparing SNPs within trait-associated loci to all SNPs in the genome, and comparing lead  
293 SNPs to SNPs in the trait-association loci (**Methods**). We first compared SNPs in the trait-  
294 associated loci against the entire genome. The strongest enrichment of SNPs in trait  
295 associated loci was seen in flanking regions (upstream, downstream, 5' and 3' UTR) with  
296 average fold enrichment ( $E$ ) 1.31 (**Fig. 3d** and **Table 2**). Non-coding SNPs, in total, covered  
297 93.1% of SNPs in the trait-associated loci, while intergenic SNPs were significantly depleted  
298 ( $E=0.83$ ) and intronic SNPs significantly enriched compared to all SNPs in the genome  
299 ( $E=1.17$ ; **Table 2**). SNPs in trait-associated loci were also slightly enriched for being exonic  
300 compared to the entire genome ( $E=1.07$ ). Active chromatin states and eQTLs were also  
301 significantly enriched with notably high enrichment of eQTLs ( $E=1.61$  and  $5.95$ ,  
302 respectively; **Table 2**).

303 We next compared lead SNPs with SNPs in the trait-associated loci. The strongest  
304 enrichment for lead SNPs was seen in exonic SNPs ( $E=2.84$ ) followed by flanking regions  
305 ( $E=1.38$ ), while intronic and intergenic regions were slightly depleted (average  $E=0.95$ ; **Fig.**  
306 **3d** and **Table 2**). These results clearly indicate that SNPs located in exonic and flanking  
307 regions tend to show stronger effect sizes than other SNPs in the trait-associated loci. On the  
308 other hand, active chromatin states showed slight enrichment ( $E=1.08$ ) while eQTLs were  
309 significantly depleted ( $E=0.80$ ; **Fig. 3e-f** and **Table 2**). This suggests that SNPs within the  
310 trait-associated loci largely overlap with regulatory elements but these elements do not  
311 always have the strongest effect sizes within the loci.

312

### 313 *Characterization of credible set SNPs based on fine-mapping*

314 Owing to the small effect sizes of variants in complex traits and extensive LD throughout the  
315 human genome, there is a reasonable chance that lead SNPs (i.e. defined based on LD and P-

316 values) are not the causal SNPs in the trait-associated loci<sup>24</sup>, even when the causal SNPs are  
317 actually measured or imputed. Statistical fine-mapping utilizes evidence of the associations at  
318 each variant in the loci (effect sizes and LD structure) to assign posterior probability of each  
319 specific model at particular locus, which are then used to infer the posterior probabilities of  
320 each SNP being included in the model (posterior inclusion probability, PIP) and ascertain the  
321 minimum set of SNPs required to capture the likely causal variant. We performed fine-  
322 mapping using FINEMAP software<sup>25</sup> for each trait-associated locus, setting the maximum  
323 number of SNPs in the causal configuration ( $k$ ) to 10 and using randomly selected 100k  
324 individuals from UKB2 as a reference panel (see **Methods**). From all of the loci associated  
325 with at least one of the 558 traits, we obtained a list of credible SNPs with  $PIP > 0.95$  consists  
326 of 196,542 SNPs (**Supplementary Information 9**).

327 Next we characterized credible SNPs in respect to their functional annotations, similar as  
328 done above with lead SNPs. We thus compared SNPs in the fine-mapped regions to all SNPs  
329 in the genome, and credible SNPs to SNPs in the fine-mapped regions. The enrichment  
330 pattern of SNPs in the fine-mapped regions was similar to SNPs in the trait-associated loci;  
331 i.e. significant enrichment of SNPs in intronic and flanking regions but the fold enrichment  
332 was much smaller (**Fig. 3d** and **Table 2**). This is mainly because the fine-mapped regions are  
333 often larger than the trait-associated loci by taking 50kb around the top SNPs of the trait-  
334 associated loci. In contrast, fold enrichment of exonic SNPs was slightly higher than trait-  
335 associated loci (**Table 2**). As we observed higher gene-density around the trait-associated  
336 loci, expanding the loci resulted in larger proportion of exonic regions. Both active chromatin  
337 state and eQTLs were significantly enriched, however, fold enrichment of eQTLs was  
338 notably less than trait-associated loci (**Fig. 3e-f** and **Table 2**). Similar to the lead SNPs,  
339 credible SNPs showed strong enrichment in exonic ( $E=1.40$ ) and flanking regions ( $E=1.29$ ),  
340 as well as intronic regions ( $E=1.17$ ; **Table 2**). Although an enrichment of active chromatin

341 state is consistent with the result observed in the lead SNPs ( $E=1.51$ ), eQTLs were also  
342 significantly enriched in credible SNPs with very strong fold increase ( $E=4.14$ ; **Fig. 3e-f** and  
343 **Table 2**).

344 In summary, the number of credible SNPs is 4.5 times larger than the number of lead SNPs,  
345 since for determining lead SNPs, all SNPs that have high LD with lead SNPs are discarded  
346 while the fine-mapping captures likely causal SNPs given the observed pattern of association  
347 and LD structure. Lead SNPs and credible SNPs show different distributions of enrichment in  
348 tested biological functions. We observed a decreased proportion of exonic SNPs and an  
349 increased proportion of non-coding or regulatory SNPs within the credible SNPs compared to  
350 the lead SNPs. These findings may be due to the fact that coding SNPs tend to have higher  
351 effect sizes and are more often assigned as lead SNPs, while the fine-mapping in regions  
352 containing some of these causal coding variants may disperse a proportion of probability to  
353 adjacent variants. On the other hand, in loci where causal variants are acting through  
354 regulatory mechanisms, the credible sets may be more likely to capture the actual, single or  
355 multiple causal variants as compared to the lead SNPs.

356

### 357 **The nature of genetic architecture**

358 The genetic architecture of a trait reflects the characteristics of genetic variants that  
359 contribute to the phenotypic variability, and is defined by e.g. the number of variants  
360 affecting the trait, the distribution of effect sizes, the MAF and the level of interactions  
361 between SNPs<sup>9</sup>. To gain insight into how the genetic architecture varies across multiple  
362 complex traits, we assessed the SNP heritability ( $h^2_{SNP}$ ) and the polygenicity of 558 traits.

363

364 *SNP heritability*



365  $h^2_{SNP}$  is an indication of the total amount of variance that is captured by the additive effects of  
366 all variants included in a GWAS.  $h^2_{SNP}$  depends on several factors, such as the number of  
367 SNPs included in the analyses based on their MAF given the current sample size, the  
368 polygenicity of the trait (i.e. how many SNPs have an effect) and the distribution of effect  
369 sizes. We estimated  $h^2_{SNP}$  for each trait using LDSC<sup>17</sup> and SumHer from LDAK<sup>26,27</sup>  
370 (**Methods**). The estimates of  $h^2_{SNP}$  using LDSC and SumHer showed strong positive  
371 correlation ( $r=0.77$  and  $p=3.8e-111$ ; **Fig. 4a**). Therefore, we focus on estimates based on  
372 LDSC, hereafter, however complete results are available in **Supplementary Table 22** and  
373 discussed in **Supplementary Information 10 (Extended Data Fig. 11)**. The highest  $h^2_{SNP}$   
374 was observed for height ( $h^2_{SNP}=0.31$ ) followed by bone mineral density ( $h^2_{SNP}=0.27$ ). Of 558  
375 traits, 214 traits, with an average sample size 292,267, showed  $h^2_{SNP}$  less than 0.05. Most of  
376 these traits are classically regarded as ‘environmental’ (e.g. current employment status,  
377 illness of family members and transport types or activity traits including frequency and type  
378 of physical activities and type of accommodation), and tend to have a low  $H^2$ <sup>14</sup>. For these  
379 traits, the number of detected trait-associated loci is also very low with a median 3. Given the  
380 combination of current sample size of  $> 200,000$  and low  $h^2_{SNP}$ , this suggests that for these  
381 traits increasing the sample size may not lead to a substantial increase in detected loci.

382

### 383 *Polygenicity and discoverability of complex traits*

384 The general observation from GWASs is that with increasing sample size, detected signals  
385 become not only more reliable but also more numerous, as with increasing power, smaller  
386 SNP effects may be detected. The total number of associated SNPs, the amount of variance  
387 they collectively represent, the distribution of effect sizes across the associated SNPs and  
388 how many additional individuals are expected to be needed for the detection of a fixed

389 number of novel SNPs, are indications of the polygenicity of a trait. Such polygenicity may  
390 vary across traits, and can be informative for designing SNP-discovery studies.

391 To obtain an indication of trait-polygenicity, we applied the Causal Mixture Model for  
392 GWAS summary statistics (MiXeR)<sup>28</sup> to estimate  $\pi$  (fraction of independent causal SNPs,  
393 polygenicity) and  $\sigma_{\beta}^2$  (variance of effect sizes of the causal SNPs, discoverability; see  
394 **Methods**).  $\pi$  ranges between 0 and 1, and a high  $\pi$  indicates a high level of polygenicity,  
395 while a high  $\sigma_{\beta}^2$  indicates a high level of discoverability of causal SNPs for the traits. Since  
396 the standard error of the model estimates become larger for traits with very small  $h^2_{SNP}$  due to  
397 the small effect sizes, we only discuss the results of 197 out of 558 traits with  $h^2_{SNP} > 0.05$  and  
398 standard error of  $\pi$  less than 50% of the estimated value (as recommended by O. Frei; full  
399 results are available in **Supplementary Table 23**). We observed, as expected, a negative  
400 relationship between polygenicity and discoverability ( $r = -0.89$  and  $p = 4.93e-70$ ), confirming  
401 that highly polygenic traits tend to have less causal SNPs with larger effect sizes (**Fig. 4b**).

402 The majority of traits (i.e. 116 traits) showed high polygenicity with  $\pi > 1e-3$  (more than 0.1%  
403 of all SNPs are causal). The highest polygenicity was observed in Major depressive disorder  
404 with 0.6% of SNPs being causal, while some traits, such as fasting glucose and serum urate  
405 level showed relatively low polygenicity (**Fig. 4b** and **Supplementary Table 23**). The traits  
406 with polygenicity  $> 0.1\%$  showed, on average, 8 times less discoverability compared to other  
407 traits with  $< 0.1\%$  of causal SNPs. The GWAS discoveries for traits with lower polygenicity  
408 and high discoverability will saturate with a lower sample size compared to the traits with  
409 higher polygenicity. Indeed, the estimated sample size, which is required to explain 90% of  
410 SNP heritability by genome-wide significant SNPs, is positively correlated with polygenicity  
411 ( $r = 0.84$  and  $p = 6.30e-54$ ), and extremely polygenic traits require tens of millions of subjects  
412 to identify 90% of causal SNPs at a genome-wide significant level (**Fig. 4c**).

413

## 414 **Discussion**

415 The availability of hundreds of GWAS results provides the unique opportunity to gain insight  
416 into currently understudied questions regarding the genetic architecture of human traits. To  
417 facilitate such insight, we compiled a catalogue of 4,155 GWASs which can be queried  
418 online (<http://atlas.ctglab.nl>). We selected 558 well-powered GWASs to answer fundamental  
419 questions concerning the extent of pleiotropy of loci, genes, SNPs and gene-sets,  
420 characteristics of trait-associated variants and the polygenicity of traits.

421 We found that the total summed length of trait-associated loci for the 558 analysed traits  
422 covered more than half (60.1%) of the genome. 90% of the grouped loci contained  
423 associations with multiple traits across multiple trait domains. High locus pleiotropy can  
424 occur in two scenarios; *i*) when the same gene in a locus is associated with multiple traits or  
425 *ii*) when different genes or SNPs in the same locus are associated with multiple traits but due  
426 to LD the same locus is indicated. Our results showed that the proportion of pleiotropic  
427 associations dropped from 90% at the locus level to 63% at the gene level, and to 31% at the  
428 SNP level. These results show that although locus pleiotropy is widespread, pleiotropy at the  
429 level of genes and SNPs is much less abundant. This suggests that a gene can be involved in  
430 two distinct traits but how that gene is affected by the causal SNPs might differ. For instance,  
431 the function of the gene can be disrupted through a coding SNP for one trait, but expression  
432 of the same gene can be affected through a regulatory SNP for another trait.

433 Genes and SNPs that had a higher level of pleiotropy, were less tissue specific in terms of  
434 gene expression and active eQTLs. This suggests that SNPs and genes associated with  
435 multiple trait domains are more likely to be involved in general biological functions. Indeed,  
436 the top highly pleiotropic gene-sets were mostly involved in regulation of transcription which  
437 is an essential biological mechanism for any kind of cell to be functioning. Highly pleiotropic  
438 genes, therefore, can explain general vulnerability to a wide variety of traits, yet they may be

439 less informative when the aim is to understand the causes of a specific trait. Although a large  
440 proportion of trait-associated genes are pleiotropic, the majority of trait associated gene-sets  
441 were trait-specific. Thus, the trait-specific combination of genes is highly informative, and  
442 future studies aimed at improved annotation of gene-functions will be needed to understand  
443 trait-specific gene association patterns.

444 It has been widely acknowledged that almost 90% of GWAS findings fall into non-coding  
445 regions<sup>2</sup>. Our results indeed show that 89.1% of the lead SNPs are non-coding, including  
446 intergenic (34.3%) and intronic (43.6%) SNPs. similarly, of the credible SNPs 92.4% were  
447 non-coding (intergenic 33.4% and intronic 48.1%). However, we showed different patterns  
448 when considering lead and credible SNPs; intergenic SNPs were depleted and the intronic  
449 SNPs were enriched in both the lead and credible SNPs. We also observed strong enrichment  
450 of the lead and credible SNPs in coding and flanking regions. These results indicate that both  
451 SNPs with the largest effect size (the lead SNPs) and the most likely causal SNPs (credible  
452 SNPs) within a locus tend to be located within or close to the genes. Although active  
453 chromatin states were enriched in both lead and credible SNPs, eQTLs were only enriched in  
454 credible SNPs but depleted in lead SNPs. This implies that likely causal regulatory SNPs do  
455 not necessarily have the strongest effect sizes in a locus.

456 Our analyses showed that the majority of analysed traits are highly polygenic with more than  
457 0.1% of SNPs being causal. For those highly polygenic traits, over 10s of millions of  
458 individuals are required to identify all SNPs at genome wide significance ( $p < 5e-8$ ) that can  
459 explain at least 90% of the phenotypic variance explained by additive genetic effects. In the  
460 case of polygenic traits, individuals have almost unique combinations of risk/effect alleles for  
461 a specific disease or trait. With higher levels of polygenicity, and thus larger quantities of  
462 causal SNPs, the possible combinations of them also increase. This substantially increases the  
463 degree of genetic heterogeneity of the trait, and complicates the detection of genetic effects as

464 the effect sizes of individual SNPs that are yet to be detected are even smaller than those  
465 observed in current GWASs.  
466 In conclusion, our analyses have provided novel insight into the extent of pleiotropy, the  
467 nature of associated genetic regions and how traits differ in genetic architectures. This  
468 knowledge can guide the design of future genetic studies.

## 469 **METHODS**

### 470 **Publicly available GWAS summary statistics**

471 GWAS summary statistics were curated from multiple resources and were included only  
472 when the full set of SNPs were available. We excluded whole exome sequencing studies.  
473 This yielded 2,288 GWASs from 33 consortia and any other resources where summary  
474 statistics are available (last update 23<sup>rd</sup> October 2018). From dbGAP, we obtained 2,659  
475 unique datasets ([ftp://ftp.ncbi.nlm.nih.gov/dbgap/Analyses\\_Table\\_of\\_Contents.txt](ftp://ftp.ncbi.nlm.nih.gov/dbgap/Analyses_Table_of_Contents.txt), last  
476 accessed 4<sup>th</sup> July 2017) and extracted 896 GWAS summary statistics in which a matched  
477 publication was available and sample size for a specific trait was explicitly mentioned in the  
478 original study. We excluded non-GWAS studies (e.g. PAGE (Prenatal Assessment of  
479 Genomes and Exomes) studies) and GWASs with immune-chip, whole exome sequencing  
480 and replication cohorts (exact reasons of exclusion for each dataset is available in  
481 **Supplementary Table 24**).

482 Together this resulted in a total of 3,555 GWAS summary statistics. The complete list and  
483 detailed information for each GWAS with summary statistics is available in **Supplementary**  
484 **Table 3** (atlas ID 1-3184, 3785-4155).

485

### 486 **UK Biobank GWAS summary statistics**

487 Additional to the summary statistics available from external studies, we performed GWASs  
488 of traits from UK Biobank release 2 cohort (UKB2)<sup>12</sup> under application ID 16404. We only  
489 used phenotype fields with first visit and first run (e.g. f.xxx.0.0) with exceptions for multi-  
490 coded phenotypes, which allowed to assign more than one code for a single subject (see  
491 **Supplementary Information 1, 2**). From the 1,940 unique field IDs to which we had access,  
492 755 had >50,000 subjects with non-missing values. They are assigned to field name using  
493 `ukb_field.tsv` obtained from <http://biobank.ctsu.ox.ac.uk/crystal/download.cgi> (last accessed

494 31<sup>st</sup> August 2017). Note that for newly available phenotypes for release 2, we annotated field  
495 names manually based on the UK biobank data showcase. From these phenotypes, we  
496 excluded baseline characteristics, phenotypes used as covariates, date and place phenotypes,  
497 status phenotypes (i.e. completion status, answered a specific question), ethnicity, genomic  
498 phenotypes and any other phenotypes that are not relevant for performing a GWAS. For each  
499 phenotype, we provided reason of exclusions in **Supplementary Table 1**. This resulted in  
500 434 unique fields including 49 multi-coded phenotypes. 385 phenotypes were considered  
501 quantitative when the phenotype value was quantitative or categorical, and could be ordered.  
502 Phenotypes coded by yes/no were considered as binary with a few exceptions  
503 (**Supplementary Table 1**). For quantitative and binary phenotypes, subjects with phenotype  
504 codes -1 for “Do not know” or -3 for “Prefer to not answer” were excluded and the original  
505 phenotype code as described in the UK biobank data showcase was used unless specified in  
506 Supplementary Text or **Supplementary Table 1, 2**. For 49 multi-coded phenotypes, we  
507 dichotomized each code to dummy binary phenotypes (cases for 1 and controls for 0) and  
508 included subjects with phenotype code -7 for “None of the above” as controls. Again,  
509 subjects with phenotype codes -1 for “Do not know” or -3 for “Prefer to not answer” were  
510 excluded. For example, field 670 based on UKB Data-Coding 100286 is coded from 1 to 5  
511 and dichotomization results in five phenotypes such as 1 vs all others, 2 vs all others and so  
512 on. Detailed definitions of multi-coded phenotypes are described in **Supplementary Table 2**.  
513 After phenotyping, we selected phenotypes that had at least 50,000 European subjects. For  
514 binary traits, we further restricted to traits with at least 10,000 cases and controls. This  
515 resulted in a total of 600 traits (260 quantitative and 340 binary traits). Note that the final  
516 total sample size encoded in the atlas database (<http://atlas.ctglab.nl>) might be less than  
517 50,000 due to lack of genotype data or missing values in covariates.

518 GWAS was performed for up to 10,846,944 SNPs with MAF > 0.0001 using PLINK 2<sup>29</sup>,  
519 while correcting for array, age (f.54.0.0), sex (f.31.0.0), Townsend deprivation index  
520 (f.189.0.0), assessment centre (f.21003.0.0) and 20 PCs. Linear or logistic models were used  
521 for quantitative or binary traits, respectively.

522 The complete list of traits from UK biobank release 2 analysed in this study is available in  
523 **Supplementary Table 3** (atlas ID 3185-3784).

524

### 525 **Pre-processing of GWAS summary statistics**

526 Curated summary statistics were pre-processed to standardize the format. SNPs with  $p \leq 0$  or  
527  $> 1$ , or non-numeric values such as “NA” were excluded. For summary statistics with non-  
528 hg19 genome coordinates, liftOver software was used to align to hg19. When only rsID was  
529 available in the summary statistics file without chromosome and position, genome  
530 coordinates were extracted from dbSNP 146. When rsID was missing, it was assigned based  
531 on dbSNP 146. When only the effect allele was reported, the other allele was extracted from  
532 dbSNP 146.

533

### 534 **Definition of lead SNPs and trait-associated loci**

535 For each GWAS, we defined lead SNPs and genomic trait-associated loci as described before  
536 <sup>30</sup>. First, we defined independent significant SNPs with  $p < 5e-8$  and independent at  $r^2 < 0.6$ ,  
537 and defined LD blocks for each of independent significant SNPs based on SNPs with  $p < 0.05$ .  
538 Of these SNPs, we further defined lead SNPs that are independent at  $r^2 < 0.1$ . We finally  
539 defined genomic trait-associated loci by merging LD blocks closer than 250kb. Each trait-  
540 associated locus was then represented by the top SNP (with the minimum P-value) and its  
541 genomic region was defined by the minimum and maximum position of SNPs which are in



542 LD ( $r^2 \geq 0.6$ ) with one of the independent significant SNPs within the (merged) locus. We  
543 used 1000 genome phase 3 (1000G)<sup>31</sup> as a reference panel to compute LD for most of the  
544 GWASs in the database. For each GWAS, the matched population (from AFR, AMR, EAS,  
545 EUR, SAS) was used as the reference based on the information obtained from the original  
546 study. For trans-ethnic GWASs, the population with the largest total sample size was used.  
547 When the GWAS was based on the UKB release 1 cohort (UKB1), we used 10,000 randomly  
548 sampled unrelated White British subjects from UKB1 as reference. For other GWASs  
549 performed in this study or GWASs based on the UKB2, 10,000 randomly selected unrelated  
550 EUR subjects were used as a reference. Non-bi-allelic SNPs were excluded from any  
551 analyses.

552 The reference panel used for each GWAS is provided in the column “Population” of  
553 **Supplementary Table 3**. For trans-ethnic GWASs, the first population was used as  
554 reference, e.g. EUR+EAS+SAS means EUR had the largest sample. GWASs based on the  
555 UKB cohort was encoded either “UKB1 (EUR)” for UKB release 1 or “UKB2 (EUR)” for  
556 UKB release 2.

557

### 558 **MAGMA gene and gene-set analysis**

559 We performed MAGMA v1.06<sup>16</sup> gene and gene-set analyses for every GWAS in the  
560 database. For gene-analysis, 20,260 protein-coding genes were obtained using the R package  
561 BioMart (Ensembl build v92 GCRh37). SNPs were assigned to genes with 1kb window at  
562 both sides. The reference panel of corresponding populations used for each GWAS was based  
563 on either 1000G, UKB1 or UKB2 as described in the previous section. The gene-set analysis  
564 was performed with default parameters (snp-wise mean model). Gene-set analysis was  
565 performed for 4,737 curated gene-sets (C2) and 5,917 GO terms (C5; 4,436 biological

566 processes, 580 cellular components and 901 molecular functions) from MsigDB v6.1  
567 (<http://software.broadinstitute.org/gsea/msigdb>, last accessed 20 Apr 2018)<sup>32</sup>.

568

### 569 **SNP heritability and genetic correlation with LD score regression**

570 We performed LD score regression (LDSC)<sup>17</sup> for each GWAS to obtain SNP heritability and  
571 pairwise genetic correlations. Pre-calculated LD scores for 1000G EUR and EAS populations  
572 were obtained from <https://data.broadinstitute.org/alkesgroup/LDSCORE/> (last accessed 26  
573 Nov 2016) and LD score regression was only performed for GWASs with either an EUR or  
574 EAS population and when the number of SNPs in the summary statistics file was > 450,000.  
575 LDSR was performed only for HapMap3 SNPs excluding the MHC region (25Mb-34Mb).  
576 When the signed effect size or odds ratio was not available in the summary statistics file, "--  
577 a1-inc" flag was used. As recommended previously<sup>33</sup>, we excluded SNPs with chi-square  
578 >80. For binary traits, the population prevalence was curated from the literature (only for  
579 diseases whose prevalence was available, **Supplementary Table 25**) to compute SNP  
580 heritability at the liability scale with "--samp-prep" and "--pop-prep" flags. For most of the  
581 personality/activity (binary) traits from UKB2 cohort, we assumed that the sample prevalence  
582 is equal to the population prevalence since the UK Biobank is a population cohort and not  
583 designed to study a certain disease/traits. Likewise, when population prevalence was not  
584 available, sample prevalence was used as population prevalence for all other binary traits.  
585 Genetic correlations were computed for pair-wise GWASs with the following criteria as  
586 suggested previously<sup>33</sup>:

- 587 • GWASs of EUR population or more than 80% of samples are EUR.
- 588 • The number of SNPs >450,000
- 589 • Signed effect size or odds ratio is available
- 590 • Effect and non-effect alleles are explicitly mentioned in the header or elsewhere.

591 • SNP heritability Z score >2

592 In total, pairwise genetic correlations were computed for 1,090 GWASs in the database.

593

594

### 595 **Selection of GWASs for cross-phenotype analyses**

596 From the 4,155 curated GWASs in the database, we selected 558 GWASs with unique traits

597 for cross-phenotype analyses based on the following criteria.

598 • Minimum sample size 50,000 and both cases and controls are >10,000 for binary  
599 phenotypes.

600 • The number of SNPs in the summary statistics is >450,000.

601 • GWAS is based on EUR population or >80% of the samples are EUR. If summary  
602 statistics of both trans-ethnic and EUR-only are available, use EUR-only GWAS.

603 • Exclude sex-specific GWAS, unless the phenotype under study is only available for a  
604 specific sex (e.g., age at menopause). If sex-specific and sex-combined GWASs are  
605 available, use sex-combined GWAS.

606 • Z-score of  $h^2_{SNP}$  computed by LDSC is >2

607 • Signed effect size (beta or odds ratio) is available in the summary statistics.

608 • Effect and non-effect alleles are explicitly mentioned in the header or elsewhere.

609 • From GWASs that met the above criteria, we selected a GWAS per trait with the  
610 maximum sample size.

611

612 UKB2 GWASs performed in this study are further filtered based on the following:

613 • Exclude cancer screening or test phenotypes.

614 • Exclude item level phenotypes (i.e., Neuroticism and Fluid intelligence tests)

615 • Exclude phenotypes of parents' age and parents' still alive.

616 • Exclude medication, treatment, supplements and vitamin traits.

- 617 • If exactly the same traits were diagnosed by an expert (e.g. doctor) and self-reported,  
618 use the expert qualification.
- 619 • If exactly the same traits were present as main and secondary diagnoses, both are  
620 included.
- 621 • Phenotypes with large extremes were excluded from the analyses when the difference  
622 between the maximum value and 99 percentiles of the standardized phenotype value  
623 is >50.

624 There was one exception for height GWAS, where a meta-analysis by Yengo et al.<sup>34</sup> (ID  
625 4044) has the larger sample size, however the meta-analysis was limited to ~2.4 million  
626 HapMap 2 SNPs. Since over 10 million SNPs are included in most of the selected GWASs,  
627 this smaller number of SNPs can bias our analyses. Therefore, the second largest GWAS  
628 (UKB2 GWAS performed in this study, ID 3187) was used instead. This resulted in total of  
629 558 GWASs, across 24 domains, which were subsequently used in the cross-phenotype  
630 analyses in this study. These 558 GWASs are specified in **Supplementary Table 3**.

631

### 632 **Pleiotropic trait-associated loci**

633 To define pleiotropic loci for the 558 traits (GWASs), we first extracted trait-associated loci  
634 on autosomal chromosomes. We excluded any locus with a single SNP (no other SNPs have  
635  $r^2 > 0.6$ ) as these loci are more likely to be false positives. We then grouped physically  
636 overlapping loci across 558 traits. In a group of loci, it is not required that all individual trait-  
637 associated loci are physically overlapping but merging them should result in a continuous  
638 genomic region. For example, when trait-associated loci A and B physically overlap and trait-  
639 associated loci B and C also physically overlap, but A and C do not, these three trait-  
640 associated loci were grouped into a single group of loci (**Extended Data Fig. 3**). Therefore, a  
641 grouped locus could contain more than one independent locus from a single trait when gaps

642 between them were filled by loci from other traits. The grouped loci were further assigned to  
643 three categories, *i*) multi-domain locus when a loci group contained traits from more than one  
644 domain, *ii*) domain specific locus when a loci group contained more than one trait from the  
645 same domain, and *iii*) trait specific locus when a locus did not overlap with any other loci.  
646 We compared the distribution of gene density across four association categories of the loci;  
647 multi-domain, domain specific and trait specific loci, and non-associated genomic regions.  
648 To define non-associated genomic regions, we extracted the minimum and maximum  
649 positions that were covered by 1000G, and the gap regions of grouped trait-associated loci  
650 were defined as non-associated regions. The gene density was computed as a proportion of a  
651 region that was overlapping with one of 20,260 protein-coding genes obtained from Ensembl  
652 v92 GRCh37. We then performed pairwise Wilcoxon rank sum test (two sided).

653

#### 654 **Colocalization of trait-associated loci**

655 To evaluate if physically overlapping trait-associated loci also share the same causal SNPs,  
656 we performed colocalization using the *coloc.abf* (Approximate Bayes Factor colocalization  
657 analysis) function of the *coloc* package in R<sup>35</sup>. Colocalization analysis was performed for all  
658 possible pairs of physically overlapping trait-associated loci across 558 traits. When two loci  
659 from different traits were physically overlapping but there were no SNPs that were present in  
660 both GWAS summary statistics in that overlapping region, colocalization was not performed.  
661 The inputs of the *coloc.abf* function are P-value, MAF and sample size for each SNP. When  
662 MAF was not available in the original summary statistics, it was extracted from the matched  
663 reference panel. For binary traits, sample prevalence was additionally provided based on total  
664 cases and controls of the study.

665 The *coloc.abf* function assumes a single causal SNP for each trait and estimates the posterior  
666 probability of the following 5 scenarios for each testing region;  $H_0$ : neither trait has a genetic

667 association,  $H_1$ : only trait 1 has a genetic association,  $H_2$ : only trait 2 has a genetic  
668 association,  $H_3$ : both trait 1 and 2 are associated but with different causal SNPs and  $H_4$ : both  
669 trait 1 and 2 are associated with the same single causal SNP. In this study, as we pre-define  
670 the trait-associated loci for each trait which already discard scenarios  $H_0$  to  $H_2$ , we are only  
671 interested whether  $H_4$  is most likely. We therefore defined, a pair of loci as colocalised when  
672 the posterior probability of  $H_4$  is  $>0.9$ . We note that it is possible that genomic regions  
673 outside of the pre-defined trait-associated loci can also colocalize with other traits. However,  
674 we limited the analyses to the pre-defined trait-associated loci in this study, to be consistent  
675 with the level of pleiotropy measured by physical overlap of the loci.  
676 Within a grouped locus defined based on physical overlap (see above), we further grouped  
677 loci based on a colocalization pattern. To do so, we considered colocalization pattern across  
678 group of physically overlapping loci as a graph in which nodes represent trait-associated loci  
679 and edges represent colocalization of the loci First, loci which did not colocalized with any  
680 other loci were considered as independent loci. For the rest of the loci, we identified  
681 connected components of the graph (**Extended Data Fig. 3**). This does not require all loci  
682 within a component to be colocalized with each other. For example, when locus A is  
683 colocalized with locus B, and locus B is colocalized with locus C, but locus A is not  
684 colocalized with locus C, all loci A, B and C are grouped into a single connected component.  
685 Detailed results are discussed in the **Supplementary Information 3**.

686

### 687 **Pleiotropic genes**

688 For gene level pleiotropy, we extracted MAGMA gene analysis results for the 558 traits  
689 where 17,444 genes on autosomal chromosomes were tested in all GWASs. For each trait,  
690 genes with  $p < 2.87e-6$  ( $0.05/17,444$ ) were considered as significantly associated. We did not  
691 correct the P-value for testing 558 traits since our purpose is not to identify genes associated

692 with one of the 558 traits but to evaluate the overlap of trait-associations (when GWAS was  
693 performed for a single trait) across the 558 traits, and this applies to SNPs and gene-set level  
694 pleiotropy. The trait associated genes were further categorized into three groups in a similar  
695 way as for trait-associated loci, i.e. *i*) multi-domain genes that were significantly associated  
696 with traits from more than one domain, *ii*) domain-specific genes that were significantly  
697 associated with more than one trait from the same domain and *iii*) trait-specific genes that  
698 were significantly associated with a single trait.

699 We compared gene length and pLI score across genes in three different association categories  
700 and non-associated genes. Gene length was based on the start and end position of genes  
701 extracted from the R package biomaRt and pLI score was obtained from  
702 [ftp://ftp.broadinstitute.org/pub/ExAC\\_release/release0.3.1/functional\\_gene\\_constraint](ftp://ftp.broadinstitute.org/pub/ExAC_release/release0.3.1/functional_gene_constraint) (last  
703 accessed 27 April 2017). We performed t-tests for gene length in log scale and Wilcoxon  
704 rank sum tests for pLI scores (both two sided).

705 For each protein coding gene, we first assessed whether a gene is expressed or not in each of  
706 53 tissue types based on expression profile obtained from GTEx v7<sup>20</sup>. We defined genes as  
707 expressed in a given tissue type if the average TPM is >1. For each of 17,444 genes, we then  
708 counted the number of tissue types where the gene is expressed and grouped them into six  
709 categories, i.e. genes expressed in *i*) a single tissue type (tissue specific genes), *ii*) between 2  
710 and 13, *iii*) between 14 and 26, *ix*) between 27 and 39, *x*) between 40 and 52, and *xi*) 53 (all)  
711 tissue types. At each number of associated domains (from 1 to 10 or more domains), we re-  
712 calculated the proportion of genes in each of the 6 categories, and performed the Fisher's  
713 exact tests (one-sided) against baseline (the proportion relative to all 17,444 genes) to  
714 evaluate if the proportion is higher than expected.

715

716 **Pleiotropic SNPs**

717 We extracted 1,740,179 SNPs that were present in all 558 GWASs. To evaluate if the select  
718 ion of ~1.7 million SNPs biased the results, we compared distribution of these analysed SNPs  
719 with the all known SNPs in the genome (SNPs exist in 1000G EUR population, UKB1 and  
720 UKB2 reference panels) by computing the proportion of SNPs per chromosome. In addition,  
721 distribution of functional consequences of SNPs annotated by ANNOVAR<sup>36</sup> was also  
722 compared with the all SNPs in the genome. For each SNP, we counted the number of traits to  
723 which a SNP was significantly associated at  $p < 5e-8$ , and then grouped the associated SNPs  
724 into multi-domain, domain-specific and trait-specific SNPs using the same definitions as at  
725 the gene level.

726 Functional consequences of SNPs were annotated using ANNOVAR<sup>36</sup>. To test if a SNP from  
727 a certain functional category is enriched at a given number of associated domains compared  
728 to all analysed SNPs, a baseline proportion was calculated from the 1,740,179 SNPs for each  
729 functional category. At each number of associated domains (from 1 to 10 or more domains),  
730 we re-calculated the proportion of SNPs with each functional category and performed the  
731 Fisher's exact test (one-sided) against the baseline (the proportion relative to all 1,740,179  
732 SNPs), to test if the proportion is higher than expected.

733 eQTLs for 48 tissue types were obtained from GTEx v7 (<https://www.gtexportal.org/home/>;  
734 last accessed 20 January 2018)<sup>20</sup> and we considered SNPs with gene q-value  $< 0.05$  with any  
735 gene in any tissue as eQTLs. For each eQTL, we counted the number of tissue types of being  
736 eQTL (regardless of associated genes) and categorized them into five groups, i.e. being  
737 eQTLs in *i*) a single tissue type (tissue specific eQTLs), *ii*) between two and 12, *iii*) between  
738 13 and 24, *ix*) between 25 and 36 and *x*) and being in more than 37 tissue types. At each  
739 number of associated domains, we re-calculated the proportion of SNPs in each of the 5  
740 categories, and performed the Fisher's exact test (one-sided) against baseline (the proportion  
741 relative to all 1,740,179 SNPs), to test if the proportion is higher than expected.



742

### 743 **Pleiotropic gene-sets**

744 For gene-set level pleiotropy, we extracted 10,650 gene-sets tested in all 588 traits. We then  
745 considered gene-sets with  $p < 4.69e-6$  ( $0.05/10,650$ ) as significantly associated. The trait  
746 associated gene-sets were grouped into multi-domain, domain-specific and trait-specific  
747 gene-sets with the same definitions as at the gene level.

748 We compared the number of genes and average gene-length across gene-sets in different  
749 association categories and non-associated genes. Gene length was based on the start and end  
750 position of genes extracted from R package, biomaRt. We performed two-sided t-test in log  
751 scale of the number of genes and average gene-length.

752

### 753 **Power calculation of genetic correlation**

754 Power calculations were performed using the bivariate analysis of GCTA-GRML power  
755 calculator (<http://cnsgenomics.com/shiny/gctaPower/>)<sup>37</sup>, to estimate the minimum  $r_g$  that  
756 obtain a power of 0.8 in the worst case scenario. From 558 traits, two traits with the worst  
757 case scenarios were selected, one with the minimum  $h^2_{SNP}$  estimated by LDSC and another  
758 with the minimum sample size. For each case, we obtained the minimum  $r_g$  to obtain power  
759 of 0.8 by assuming both traits are quantitative with same sample size and  $h^2_{SNP}$  and have  
760 phenotypic correlation 0.1.

761

### 762 **Hierarchical clustering of trait based on genetic correlation**

763 Hierarchical clustering was performed on the matrix of pair-wise  $r_g$ 's as calculated between  
764 the 558 traits. After Bonferroni correction for all possible trait pairs, non-significant genetic  
765 correlations were replaced with 0. The number of clusters  $k$  was optimized between 50 and  
766 250 by maximizing the silhouette score with 30 iterations for each  $k$ .

767

## 768 **Estimated standardized effect size of lead SNPs**

769 To enable comparison of effect sizes across GWASs from different studies, we first  
770 converted P-values into Z-statistics (two sided) and expressed the estimated effect size as a  
771 function of MAF and sample size as described previously<sup>21</sup> using the following equations:

$$772 \quad \hat{b} = \frac{z}{\sqrt{2p(1-p)(n+z^2)}}, \quad SE = \frac{1}{\sqrt{2p(1-p)(n+z^2)}}$$

773 where  $p$  is MAF and  $n$  is the total sample size. We used the MAF of a corresponding  
774 European reference panel (either 1000G, UKB1 or UKB2) as described in the previous  
775 section “Definition of lead SNPs and genomic trait-associated loci”. Since we were not  
776 interested in the direction of effect, we used squared standardized effect sizes for analyses in  
777 this study.

778

## 779 **Fine-mapping of trait-associated loci**

780 We defined the region to fine-map by taking 50kb around the top SNPs of the trait-associated  
781 loci. When trait-associated loci were larger than the 50kb window, the largest boundary was  
782 taken. Due to the complex LD structure, loci overlapping with the MHC region (chr6:25Mb-  
783 36Mb) were excluded. The fine-mapping was performed using the FINEMAP software  
784 (<http://www.christianbenner.com/#>) with shotgun stochastic search algorithm<sup>25</sup>. Since the  
785 coverage of true causal SNPs is affected by the sample size of the reference panel and  
786 GWASs<sup>38</sup>, we used randomly selected unrelated 100k EUR individuals from UKB2 cohort  
787 for all 558 GWASs. We limited the number of maximum causal SNPs ( $k$ ) per locus to 10.  
788 When the number of SNPs within a locus is relatively small (around 30 or less), the algorithm  
789 can fail to converge. In that case,  $k$  was decreased by 1 until FINEMAP was successfully run.  
790 Loci with less than 10 SNPs were excluded from the fine-mapping.

791 FINEMAP outputs a set of models (all possible combination of  $k$  causal SNPs in a locus)  
792 with posterior probability (PP) of being a causal model. A 95% credible set was defined by  
793 taking models from the highest PP until the cumulative sum of PP reached 0.95. Then 95%  
794 credible set SNPs were defined as unique SNPs included in the 95% credible set of models.  
795 For each SNP, a posterior inclusion probability (PIP) was calculated as the sum of PPs of all  
796 models that contains that SNP. To select most likely causal SNPs, we further defined credible  
797 SNPs consists of SNPs with  $PIP > 0.95$ . Detailed results are discussed in **Supplementary**  
798 **Information 9**.

799

#### 800 **Annotation and characterization of lead SNPs and credible SNPs**

801 Functional consequences of SNPs were annotated using ANNOVAR<sup>36</sup> based on Ensembl  
802 gene annotations on hg19. Prior to ANNOVAR, we aligned the ancestral allele with dbSNP  
803 build 146. 15-core chromatin states of 127 cell/tissue types were obtained from Roadmap<sup>39</sup>  
804 ([http://egg2.wustl.edu/roadmap/data/byFileType/chromhmmSegmentations/ChmmModels/co](http://egg2.wustl.edu/roadmap/data/byFileType/chromhmmSegmentations/ChmmModels/coreMarks/jointModel/final/all.mnemonics.bedFiles.tgz)  
805 [reMarks/jointModel/final/all.mnemonics.bedFiles.tgz](http://egg2.wustl.edu/roadmap/data/byFileType/chromhmmSegmentations/ChmmModels/coreMarks/jointModel/final/all.mnemonics.bedFiles.tgz); last accessed 16 Mar 2016) and we  
806 annotated one of the 15-core chromatin states to each of the lead SNPs based on chromosome  
807 coordinates. Subsequently, consequence state was assigned for each SNP by taking the most  
808 common state across 127 cell/tissue types. SNPs with consequence state  $\leq 7$  were defined as  
809 active. eQTLs in 48 tissue types were obtained from GTEx v7<sup>20</sup> and we only used the  
810 significant eQTLs at gene  $q$ -value  $< 0.05$ . eQTLs were assigned to SNPs by matching  
811 chromosome coordinate and alleles.

812 As we showed that trait-associated loci have higher gene density compared to non-associated  
813 regions, and GWAS signals are known to be enriched in regulatory elements<sup>40</sup>, we first  
814 identified background enrichment by comparing SNPs within trait-associated loci or fine-  
815 mapped regions with the entire genome. For this all known SNPs were extracted by

816 combining all SNPs in 1000G, UKB1 and UKB2 reference panels (~28 million SNPs in  
817 total). SNPs within the trait-associated loci were defined as the ones with P-value<0.05 and  
818  $r^2>0.6$  with one of the independent significant SNPs as described above (see section  
819 ‘Definition of lead SNPs and trait-associated loci’). Therefore, it does not necessary include  
820 all SNPs physically located within the trait-associated loci. On the other hand, SNPs within  
821 fine-mapped region include all SNPs physically located within 50kb window from the most  
822 significant SNP of a locus. To characterize lead SNPs and credible SNPs given background  
823 enrichments, we compared these SNPs against all SNPs within trait-associated loci or fine-  
824 mapped regions, respectively.

825

#### 826 **SNP heritability estimation with SumHer using LDAK model**

827 We estimated SNP heritability of 558 traits using the SumHer function from the LDAK  
828 software v5.0 (<http://dougspeed.com/ldak/>)<sup>27</sup>. Since our purpose was to compare estimates  
829 from LDSC and SumHer, we used the 1000G EUR reference panel and extracted HapMap3  
830 SNPs as consistent with LDSC. We used unique ID’s of SNPs (consisting of  
831 chromosome:posision:allele 1:allele2) instead of rsID to maximize the match between  
832 GWAS summary statistics and the reference panel. The MHC region (chr6:25Mb-34Mb) was  
833 excluded. As recommended by the author, SNPs with large effects ( $Z^2/(Z^2+n)>100$  where  $Z^2$   
834 is chi-squared statistics and  $n$  is sample size of the SNP) were excluded.

835 To obtain SNP heritability in a liability scale, we provided population prevalence and sample  
836 prevalence with flags ‘--prevalance’ and ‘--ascertainment’ for binary traits. The same  
837 population prevalence was used as described in the section of SNP heritability estimate with  
838 LDSC (**Supplementary Table 25**). Details results are discussed in **Supplementary**  
839 **Information 10**.

840

## 841 **Estimation of polygenicity and discoverability with MiXeR**

842 In the causal mixture model for GWAS summary statistics (MiXeR) proposed by Holland et  
843 al., the distribution of SNP effect sizes is treated a mixture of two distributions for causal and  
844 non-causal SNPs as the following<sup>28</sup>:

$$845 \quad \beta = \pi N(0, \sigma_{\beta}^2) + (1 - \pi)N(0, 0)$$

846 where  $\pi$  is the proportion of (independent) causal SNPs and  $\sigma_{\beta}^2$  is the variance of the effect  
847 sizes of causal SNPs. Therefore,  $\pi$  and  $\sigma_{\beta}^2$  respectively represent polygenicity and  
848 discoverability of the trait. We estimated both parameters for the 558 traits using MiXeR  
849 software (<https://github.com/precimed/mixer>)<sup>28</sup>. As recommended in the original study, we  
850 used 1000G EUR as a reference panel and restricted to HapMap 3 SNPs. SNPs with  $\chi^2 > 80$   
851 and the MHC region (chr6:26Mb-34Mb) were excluded. To estimate the sample size required  
852 to explain 90% of the additive genetic variance of a phenotype, we used an output of GWAS  
853 power estimates calculated in the MiXeR software, which contains 51 data points of sample  
854 size and the proportion of chip heritability explained<sup>28</sup>. We then estimated the sample size  
855 required to reaches 90% by using the *interp1* function from the *pracma* package in R.

856

## 857 **Data and materials availability**

858 All publicly available GWAS summary statistics (original) files curated in this study are  
859 accessible from the original links provided at <http://atlas.ctglab.nl>. GWAS summary statistics  
860 for 600 traits from UK Biobank performed in this study are also provided at  
861 <http://atlas.ctglab.nl> and an archived file will be made available upon publication from  
862 [https://ctg.cncr.nl/software/summary\\_statistics](https://ctg.cncr.nl/software/summary_statistics).

863

## 864 REFERENCES

- 865 1. Edwards, A. O. *et al.* Complement factor H polymorphism and age-related macular  
866 degeneration. *Science (80-. )*. **308**, 421–425 (2005).
- 867 2. Welter, D. *et al.* The NHGRI GWAS Catalog, a curated resource of SNP-trait  
868 associations. *Nucleic Acids Res.* **42**, D1001–D1006 (2014).
- 869 3. Lander, E. S. Initial impact of the sequencing of the human genome. *Nature* **470**, 187–  
870 197 (2011).
- 871 4. Visscher, P. M. *et al.* 10 Years of GWAS Discovery : Biology, Function, and  
872 Translation. *Am. J. Hum. Genet.* **101**, 5–22 (2017).
- 873 5. Henderson, P. & Stevens, C. The role of autophagy in Crohn’s Disease. *Cells* **1**, 492–  
874 519 (2012).
- 875 6. Okada, Y. *et al.* Genetics of rheumatoid arthritis contributes to biology and drug  
876 discovery. *Nature* **506**, 376–81 (2014).
- 877 7. Gaulton, K. J. *et al.* Genetic fine mapping and genomic annotation defines causal  
878 mechanisms at type 2 diabetes susceptibility loci. *Nat. Genet.* **47**, 1415–1425 (2015).
- 879 8. Canela-Xandri, O., Rawlik, K. & Tenesa, A. An atlas of genetic associations in UK  
880 Biobank. *Nat. Genet.* **50**, 1593–1599 (2018).
- 881 9. Timpson, N. J., Greenwood, C. M. T., Soranzo, N., Lawson, D. J. & Richards, J. B.  
882 Genetic architecture: The shape of the genetic contribution to human traits and disease.  
883 *Nat. Rev. Genet.* **19**, 110–124 (2018).
- 884 10. Boyle, E. A., Li, Y. I. & Pritchard, J. K. An expanded view of complex traits: from  
885 polygenic to omnigenic. *Cell* **169**, 1177–1186 (2017).
- 886 11. Wray, N. R., Wijmenga, C., Sullivan, P. F., Yang, J. & Visscher, P. M. Common  
887 disease is more complex than implied by the core gene omnigenic model. *Cell* **173**,  
888 1573–1580 (2018).
- 889 12. Bycroft, C. *et al.* The UK Biobank resource with deep phenotyping and genomic data.  
890 *Nature* **562**, 203–209 (2018).
- 891 13. Goh, K. *et al.* The human disease network. *Proc. Natl. Acad. Sci.* **104**, 8685–8690  
892 (2007).
- 893 14. Polderman, T. J. C. *et al.* Meta-analysis of the heritability of human traits based on  
894 fifty years of twin studies. *Nat. Publ. Gr.* **47**, 702–709 (2015).
- 895 15. Mahajan, A. *et al.* Fine-mapping type 2 diabetes loci to single-variant resolution using  
896 high-density imputation and islet-specific epigenome maps. *Nat. Genet.* (2018).
- 897 16. de Leeuw, C. A., Mooij, J. M., Heskes, T. & Posthuma, D. MAGMA: generalized  
898 gene-set analysis of GWAS data. *PLoS Comput. Biol.* **11**, e1004219 (2015).
- 899 17. Bulik-sullivan, B. K. *et al.* LD Score regression distinguishes confounding from  
900 polygenicity in genome-wide association studies. *Nat. Genet.* **47**, 291–295 (2015).
- 901 18. Solovieff, N., Cotsapas, C., Lee, P. H., Purcell, S. M. & Smoller, J. W. Pleiotropy in  
902 complex traits: Challenges and strategies. *Nat. Rev. Genet.* **14**, 483–495 (2013).
- 903 19. Lek, M. *et al.* Analysis of protein-coding genetic variation in 60,706 humans. *Nature*  
904 **536**, 285–291 (2016).
- 905 20. The GTEx Consortium. Genetic effects on gene expression across human tissues.  
906 *Nature* **550**, 204–213 (2017).
- 907 21. Zhu, Z. *et al.* Integration of summary data from GWAS and eQTL studies predicts  
908 complex trait gene targets. *Nat. Genet.* **48**, 481–487 (2016).
- 909 22. Manolio, T. A. *et al.* Finding the missing heritability of complex diseases. *Nature* **461**,  
910 747–753 (2009).
- 911 23. Lee, S., Abecasis, G. R., Boehnke, M. & Lin, X. Rare-variant association analysis:

- 912 Study designs and statistical tests. *Am. J. Hum. Genet.* **95**, 5–23 (2014).
- 913 24. van de Bunt, M., Cortes, A., Brown, M. A., Morris, A. P. & McCarthy, M. I.  
914 Evaluating the performance of fine-mapping strategies at common variant GWAS loci.  
915 *PLoS Genet.* **11**, e1005535 (2015).
- 916 25. Benner, C. *et al.* FINEMAP : efficient variable selection using summary data from  
917 genome-wide association studies. *Bioinformatics* **32**, 1493–1501 (2016).
- 918 26. Speed, D. *et al.* Reevaluation of SNP heritability in complex human traits. *Nat. Genet.*  
919 **49**, 986–992 (2017).
- 920 27. Speed, D. & Balding, D. J. Better estimation of SNP heritability from summary  
921 statistics provides a new understanding of the genetic architecture of complex traits.  
922 *Nat. Genet.* (2018).
- 923 28. Holland, D. *et al.* Beyond SNP heritability: polygenicity and discoverability estimated  
924 for multiple phenotypes with a univariate gaussian mixture model. *bioRxiv* (2018).
- 925 29. Purcell, S. *et al.* PLINK: A tool set for whole-genome association and population-  
926 based linkage analyses. *Am. J. Hum. Genet.* **81**, 559–575 (2007).
- 927 30. Watanabe, K., Taskesen, E., van Bochoven, A. & Posthuma, D. Functional mapping  
928 and annotation of genetic associations with FUMA. *Nat. Commun.* **8**, 1826 (2017).
- 929 31. Auton, A. *et al.* A global reference for human genetic variation. *Nature* **526**, 68–74  
930 (2015).
- 931 32. Liberzon, A. *et al.* Molecular signatures database (MSigDB) 3.0. *Bioinformatics* **27**,  
932 1739–1740 (2011).
- 933 33. ZHENG, J. *et al.* LD Hub: a centralized database and web interface to perform LD  
934 score regression that maximizes the potential of summary level GWAS data for SNP  
935 heritability and genetic correlation analysis. *Bioinformatics* **33**, 272–279 (2017).
- 936 34. Yengo, L. *et al.* Meta-analysis of genome-wide association studies for height and body  
937 mass index in ~700000 individuals of European ancestry. *Hum. Mol. Genet.* **27**, 3641–  
938 3649 (2018).
- 939 35. Giambartolomei, C. *et al.* Bayesian Test for Colocalisation between Pairs of Genetic  
940 Association Studies Using Summary Statistics. *PLoS Genet.* **10**, e1004383 (2014).
- 941 36. Wang, K., Li, M. & Hakonarson, H. ANNOVAR: functional annotation of genetic  
942 variants from high-throughput sequencing data. *Nucleic Acids Res.* **38**, e164 (2010).
- 943 37. Visscher, P. M. *et al.* Statistical power to detect genetic (co)variance of complex traits  
944 using SNP data in unrelated samples. *PLoS Genet.* **10**, e1004269 (2014).
- 945 38. Benner, C. *et al.* Prospects of fine-mapping trait-associated genomic regions by using  
946 summary statistics from genome-wide association studies. *Am. J. Hum. Genet.* **101**,  
947 539–551 (2017).
- 948 39. Roadmap Epigenomics Consortium. Integrative analysis of 111 reference human  
949 epigenomes. *Nature* **518**, 317–330 (2015).
- 950 40. Tak, Y. G. & Farnham, P. J. Making sense of GWAS: using epigenomics and genome  
951 engineering to understand the functional relevance of SNPs in non-coding regions of  
952 the human genome. *Epigenetics Chromatin* **8**, 57 (2015).
- 953

954 **END NOTES**

955 **Acknowledgement** We thank all consortiums and all other individual labs for making  
956 GWAS summary statistics publicly available. We also thank Peter Visscher and Naomi Wray  
957 for their thoughtful suggestions and discussions. We additionally thank Anders Dale for his  
958 suggestions for the manuscript. This work was funded by Netherlands Organization for  
959 Scientific Research (NWO VICI 453-14-005 and NWO VIDI 452-12-014).

960 **Author contribution** D.P. designed the study. K.W. curated the database and performed  
961 analyses. T.J.C.P assisted with harmonization of phenotype labels of the database. S.S.  
962 performed QC on the UK Biobank data and wrote the analysis pipeline for UKB analyses.  
963 M.U.M assisted with the fine-mapping analyses. O.F. and O.A.A. developed software  
964 UGMG and assisted with the analyses. S.v.d.S and B.M.N discussed and provided valuable  
965 suggestions for analyses. K.W. and D.P. wrote the paper. All authors critically reviewed the  
966 paper.

967 **Competing interests** The authors declare no competing financial interest.

968 **Corresponding author** Correspondence and requests for materials should be addressed to  
969 D.P. ([danielle.posthuma@vu.nl](mailto:danielle.posthuma@vu.nl)).

970



971 **Table 1. Count and proportion of pleiotropic trait-associated loci, genes, SNPs and**  
 972 **gene-sets.**

|                        | Loci        |        | Genes  |        | SNPs      |        | Gene-set |        |
|------------------------|-------------|--------|--------|--------|-----------|--------|----------|--------|
|                        | Length (Mb) | %      | Count  | %      | Count     | %      | Count    | %      |
| <b>Total in genome</b> | 2796.10     | 100.00 | 17,444 | 100.00 | 1,740,179 | 100.00 | 10,650   | 100.00 |
| <b>Associated</b>      | 1706.00     | 61.01  | 11,443 | 65.60  | 236,388   | 13.58  | 1,106    | 10.38  |
| Pleiotropic*           | 1592.53     | 93.35  | 9,252  | 80.85  | 142,376   | 60.23  | 606      | 54.79  |
| Multi-domain           | 1535.76     | 90.02  | 7,657  | 66.91  | 76,650    | 32.43  | 361      | 32.64  |
| Domain specific        | 56.77       | 3.33   | 1,595  | 13.94  | 65,726    | 27.80  | 245      | 22.15  |
| Trait specific         | 113.48      | 6.65   | 2,191  | 19.15  | 94,012    | 39.77  | 500      | 45.21  |
| <b>Non-associated</b>  | 1090.10     | 38.99  | 6,001  | 34.40  | 1,503,791 | 86.42  | 9,544    | 89.61  |

973 \*The count of pleiotropic loci, genes, SNPs and gene-sets is the sum of the multi-domain and  
 974 domain specific categories. Proportion of pleiotropic, multi-domain, domain specific and trait  
 975 specific categories are relative to the associated loci, SNPs, genes or gene-sets, respectively.

976

977 **Table 2. Characteristics of lead SNPs and credible SNPs with PIP>0.95 across 558 traits versus all SNPs in the genome.**

| Annotation categories   | Genome   | Trait-associated loci |      |                | lead SNPs |      |                | 50kb around the top SNPs <sup>a</sup> |      |                | Credible SNPs (PIP>0.95) <sup>b</sup> |      |                |
|-------------------------|----------|-----------------------|------|----------------|-----------|------|----------------|---------------------------------------|------|----------------|---------------------------------------|------|----------------|
|                         | %        | %                     | E    | P <sup>c</sup> | %         | E    | P <sup>d</sup> | %                                     | E    | P <sup>e</sup> | %                                     | E    | P <sup>e</sup> |
| <b>Non-coding</b>       | 94.37    | 93.06                 | 0.99 | < 1e-323       | 89.13     | 0.96 | 1.14E-185      | 94.04                                 | 1.00 | < 1e-323       | 92.39                                 | 0.98 | 7.60E-192      |
| Intergenic              | 44.11    | 36.88                 | 0.84 | < 1e-323       | 34.31     | 0.93 | 1.20E-27       | 41.41                                 | 0.94 | < 1e-323       | 33.40                                 | 0.81 | < 1e-323       |
| Intronic                | 38.29    | 44.88                 | 1.17 | < 1e-323       | 43.85     | 0.98 | 2.38E-05       | 41.14                                 | 1.07 | < 1e-323       | 48.07                                 | 1.17 | < 1e-323       |
| scRNA intronic          | 11.98    | 11.29                 | 0.94 | 1.34E-115      | 10.98     | 0.97 | 0.044458       | 11.49                                 | 0.96 | < 1e-323       | 10.92                                 | 0.95 | 2.49E-15       |
| <b>Coding</b>           | 2.15     | 2.40                  | 1.12 | 7.42E-73       | 4.60      | 1.92 | 1.33E-147      | 2.27                                  | 1.06 | 4.02E-186      | 2.86                                  | 1.26 | 7.38E-63       |
| Exonic                  | 1.06     | 1.13                  | 1.07 | 2.27E-14       | 3.22      | 2.84 | 1.30E-230      | 1.20                                  | 1.14 | < 1e-323       | 1.68                                  | 1.40 | 1.62E-73       |
| Splicing                | 1.16E-02 | 1.13E-02              | 0.98 | 8.62E-01       | 2.11E-02  | 1.86 | 0.102234       | 1.29E-02                              | 1.11 | 7.00E-05       | 1.95E-02                              | 1.51 | 1.59E-02       |
| ncRNA exonic            | 1.07     | 1.25                  | 1.16 | 6.02E-71       | 1.36      | 1.09 | 0.04846        | 1.05                                  | 0.98 | 5.12E-11       | 1.16                                  | 1.10 | 4.14E-06       |
| ncRNA splicing          | 5.40E-03 | 5.09E-03              | 0.94 | 7.03E-01       | 2.35E-03  | 0.46 | 0.72602        | 5.25E-03                              | 0.97 | 5.06E-01       | 3.07E-03                              | 0.59 | 2.66E-01       |
| <b>Flanking regions</b> | 3.48     | 4.54                  | 1.31 | < 1e-323       | 6.27      | 1.38 | 4.60E-57       | 3.68                                  | 1.06 | 1.04E-299      | 4.75                                  | 1.29 | 1.48E-125      |
| Upstream                | 1.09     | 1.33                  | 1.22 | 9.09E-124      | 1.64      | 1.23 | 1.08E-07       | 1.09                                  | 1.00 | 7.59E-01       | 1.29                                  | 1.18 | 5.45E-16       |
| 5' UTR                  | 0.30     | 0.44                  | 1.48 | 4.61E-151      | 0.78      | 1.76 | 1.64E-20       | 0.35                                  | 1.16 | 4.71E-183      | 0.57                                  | 1.66 | 8.75E-55       |
| 3' UTR                  | 0.98     | 1.32                  | 1.34 | 2.41E-260      | 2.06      | 1.56 | 5.69E-34       | 1.13                                  | 1.15 | < 1e-323       | 1.67                                  | 1.48 | 2.47E-98       |
| Downstream              | 1.10     | 1.45                  | 1.32 | 4.18E-256      | 1.79      | 1.23 | 3.38E-08       | 1.11                                  | 1.01 | 9.73E-03       | 1.21                                  | 1.09 | 5.23E-05       |
| <b>Active chromatin</b> | 17.24    | 27.74                 | 1.61 | < 1e-323       | 30.10     | 1.08 | 1.24E-27       | 20.63                                 | 1.20 | < 1e-323       | 31.06                                 | 1.51 | < 1e-323       |
| <b>eQTLs</b>            | 9.66     | 57.41                 | 5.95 | < 1e-323       | 46.15     | 0.80 | 7.54E-190      | 11.45                                 | 1.19 | < 1e-323       | 47.47                                 | 4.14 | < 1e-323       |

978 E: fold enrichment (proportion of SNPs with a certain annotation divided by the proportion of SNPs with the same annotation in background).

979 <sup>a</sup>Only including the fine-mapped regions (for loci larger than 50kb windows from the top SNPs, the largest boundaries were taken). <sup>b</sup>From 95%

980 credible set SNPs, only SNPs with posterior inclusion probability (PIP)>0.95 were selected. <sup>c</sup>P-value of Fisher's exact test (two-sided) against

981 the entire genome. <sup>d</sup>P-value of Fisher's exact test (two-sided) against trait-associated loci. <sup>e</sup>P-value of Fisher's exact test (two-sided) against

982 50kb around the top SNPs.

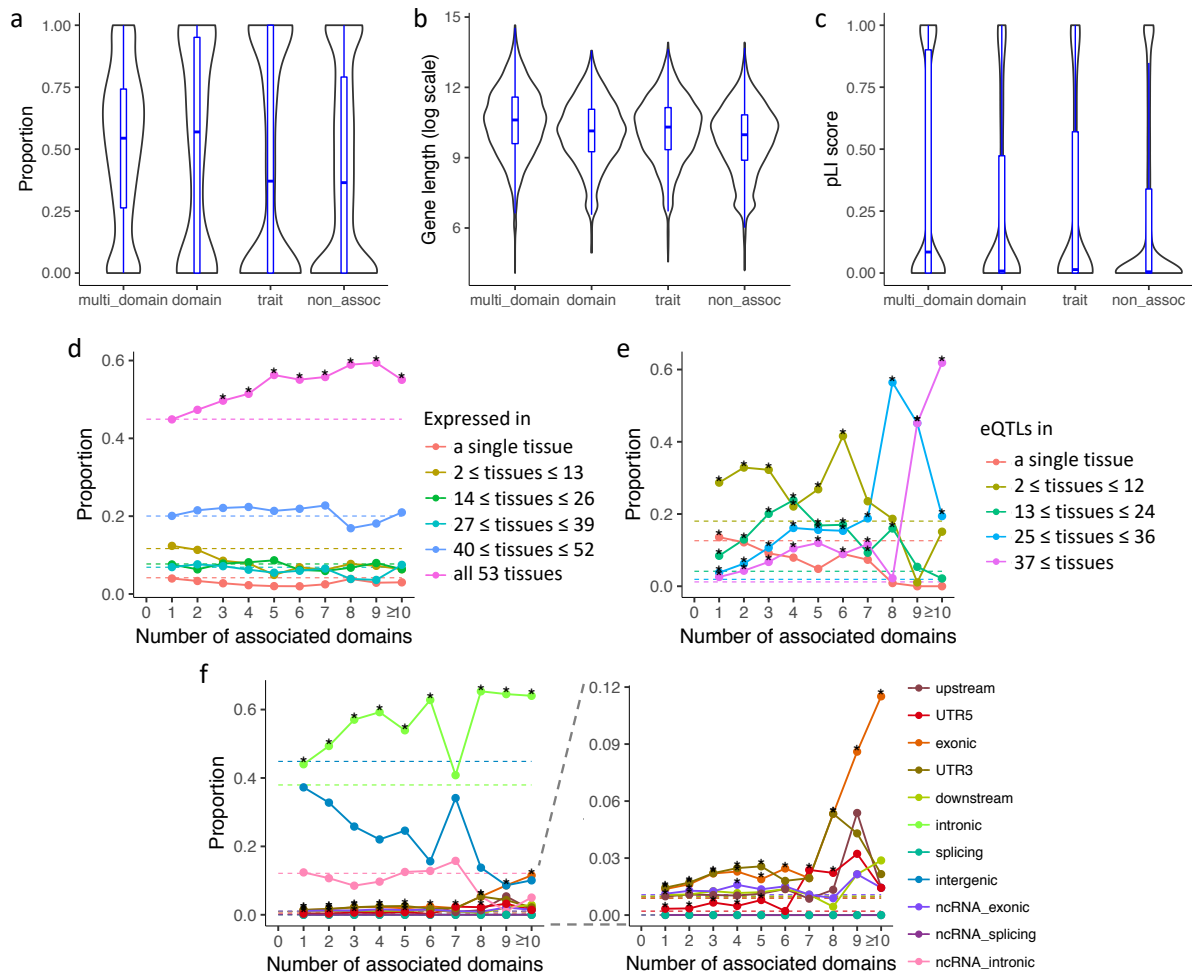

983

984 **Fig. 1. Trait-associated locus, gene and SNP pleiotropy across the genome. a.**

985 Distribution of gene density of loci with different association types. **b.** Distribution of gene  
 986 length in log scale with different association types. **c.** Distribution of pLI score of genes with  
 987 different association types. For **a-c**, multi\_domain: associated with traits from >1 domain,  
 988 domain: associated with >1 traits from a single domain, trait: associated with a single trait,  
 989 non\_assoc: not associated with any of 558 traits. **d.** Tissue specificity of genes at different  
 990 levels of pleiotropy. Each data point represents a proportion of genes expressed in a given  
 991 number of tissues for a specific number of associated domains. **e.** Proportion of SNPs with  
 992 different functional consequences at different levels of pleiotropy. Each data point represents  
 993 the proportion of SNPs with a given functional consequence for a specific number of

994 associated domains. **f.** Tissue specificity of SNPs based on active eQTLs at different levels of  
995 pleiotropy. Each data point represents the proportion of SNPs being eQTLs in a given  
996 number of tissues for a specific number of associated domains. For **d-f**, dashed lines refer to  
997 the baseline proportions (relative to all 17,444 genes (d) or all 1,740,179 SNPs (e-f)), and  
998 stars denote significant enrichment relative to the baseline (Fisher's exact test, one-sided).  
999

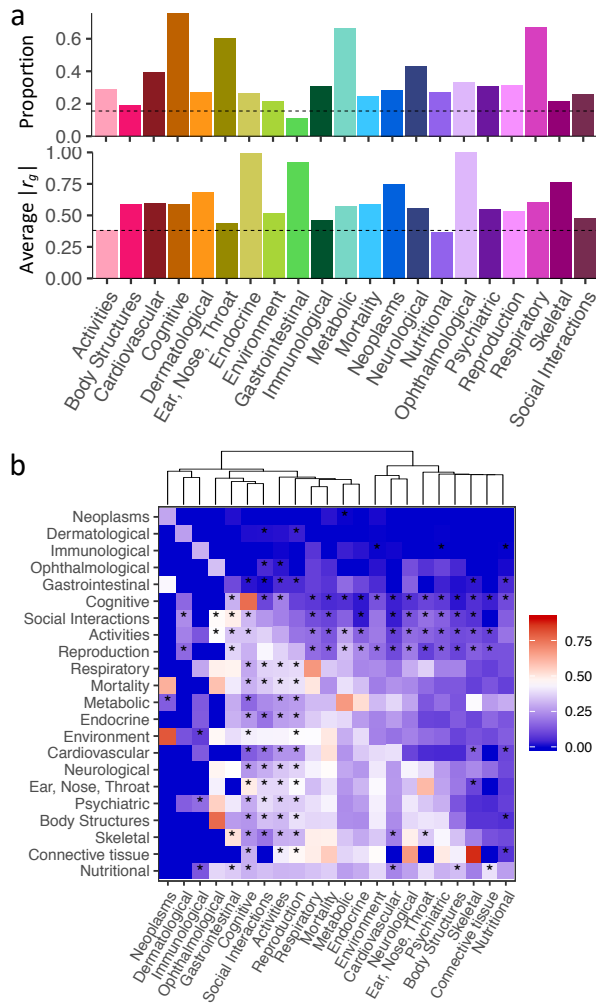

1000

1001

**Fig. 2. Within and between domains genetic correlations. a.** Proportion of trait pairs with

1002

significant  $r_g$  (top) and average  $|r_g|$  for significant trait pairs (bottom) within domains. Dashed

1003

lines represent the proportion of trait pairs with significant  $r_g$  (top) and average  $|r_g|$  for

1004

significant trait pairs (bottom) across all 558 traits, respectively. Connective tissue, muscular

1005

and infection domains are excluded as these each contains less than 3 traits. **b.** Heatmap of

1006

proportion of trait pairs with significant  $r_g$  (upper right triangle) and average  $|r_g|$  for

1007

significant trait pairs (lower left triangle) between domains. Connective tissue, muscular and

1008

infection domains are excluded as each contains less than 3 traits. The diagonal represents the

1009

proportion of trait pairs with significant  $r_g$  within domains. Stars denote the pairs of domains

1010

in which the majority (>50%) of significant  $r_g$  are negative.

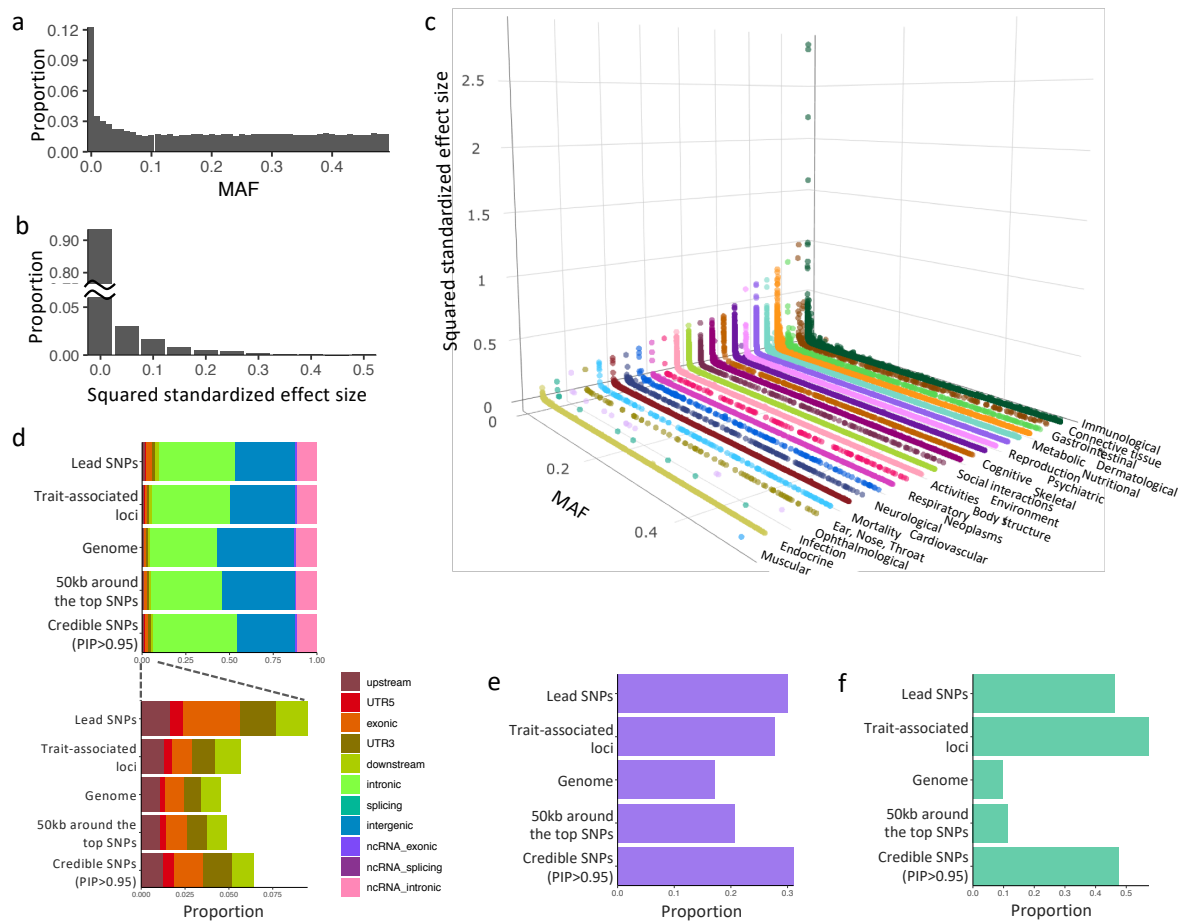

1011

1012 **Fig. 3. Distribution and characterization of lead SNPs and credible SNPs of 558 traits. a.**

1013 Histogram of MAF of the unique lead SNPs. **b.** Histogram of squared standardized effect size

1014 of lead SNPs. **c.** Scatter plot of MAF and squared standardized effect sizes of lead SNPs

1015 grouped by trait domains. **d.** Distribution of functional consequences of SNPs. **e.** Proportion

1016 of SNPs that overlap with active consequence chromatin state ( $\leq 7$ ) across 127 tissue/cell

1017 types. **f.** Proportion of SNPs overlapping with significant eQTLs from any of 48 available

1018 tissue types.

1019

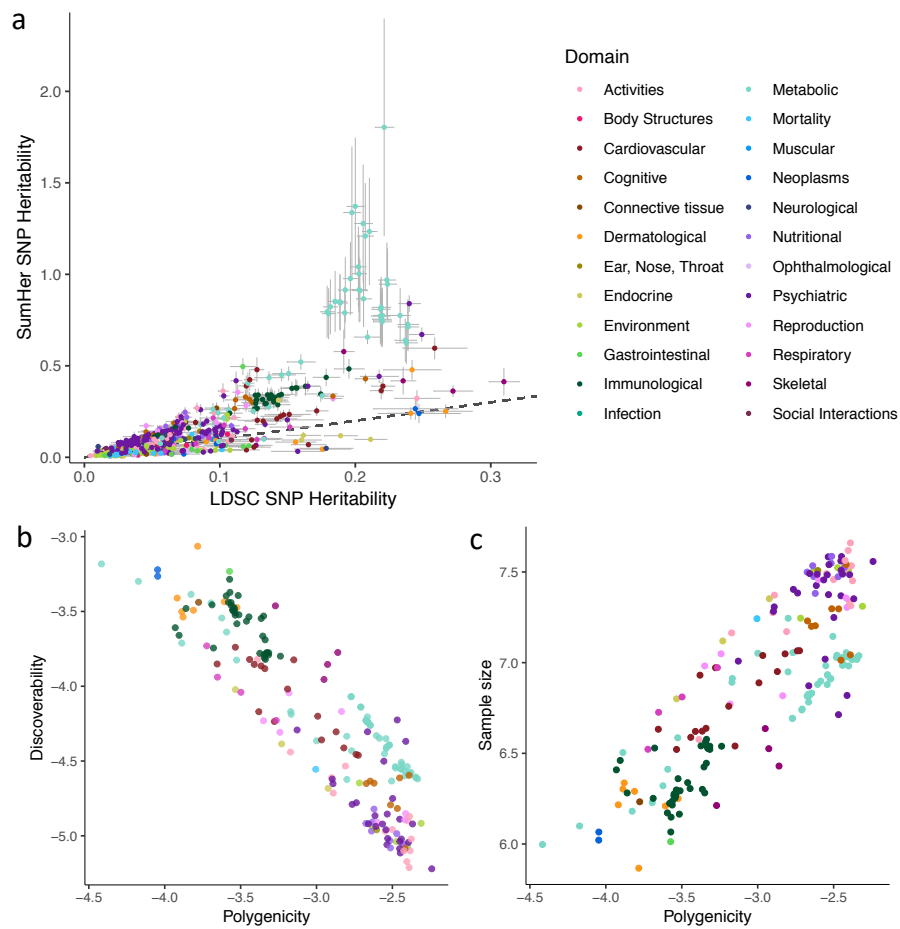

1020

1021 **Fig. 4. SNP heritability and polygenicity of 558 traits.** **a.** Comparison of SNP heritability  
 1022 estimated by LDSC (x-axis) and SumHer (y-axis). Horizontal and vertical error bar represent  
 1023 standard errors of LDSC and SumHer estimates, respectively. **b.** Polygenicity and  
 1024 discoverability of traits, both on log<sub>10</sub> scale. Out of 558 traits, only 197 traits with reliable  
 1025 estimates (i.e.  $h^2_{SNP} > 0.05$  (estimated by MiXeR) and standard error of  $\pi$  is less than 50% of  
 1026 the estimated value) are displayed. Traits are colored by domain. **c.** Polygenicity and  
 1027 estimated sample size required to reach 90% of total SNP heritability explained by genome-  
 1028 wide significant SNPs, both in log<sub>10</sub> scale. Traits are colored by domain. Full results are  
 1029 available in **Supplementary Table 22, 23.**

1030
